# Supplementary material for: Safety and Efficacy of the East Coast Fever Muguga Cocktail Vaccine: A Systematic Review
Source: MDPI journal article supplement (doi:10.3390/vaccines9111318), 2021-11-12
Supplement: s1 [file s1]

# Supplementary File S4: Data extraction.

| Reference                                               | Study/Trial      | ECF deaths in vaccinated | ECF deaths in unvaccinated | ECF diagnosis                | Other study results                                                  | Inapparent reaction                               | Mild reactions                                    | Moderate reactions | Severe reactions                                   | ECF cases in vaccinated | ECF cases in unvaccinated |
|---------------------------------------------------------|------------------|--------------------------|----------------------------|------------------------------|----------------------------------------------------------------------|---------------------------------------------------|---------------------------------------------------|--------------------|----------------------------------------------------|-------------------------|---------------------------|
| <b>Mortality</b>                                        |                  |                          |                            |                              |                                                                      |                                                   |                                                   |                    |                                                    |                         |                           |
| <b>Dolan 1980</b><br>(separated into Dolan a, b, c & d) | Challenge 1      | 0/5                      | 3/4                        | Microscopy and LN biopsy     |                                                                      | 1/5 vacc (challenge with Idobogo stabilate 89)    | 4/5 vacc (challenge with Idobogo stabilate 89)    |                    | 4/4 controls (challenge with Idobogo stabilate 89) |                         |                           |
|                                                         | Challenge 2      | 0/5                      | 3/4                        |                              |                                                                      | 3/5 vacc (challenge with Idobogo II stabilate 90) | 2/5 vacc (challenge with Idobogo II stabilate 90) |                    | 4/4 controls                                       |                         |                           |
|                                                         | Challenge 3      | 0/4                      | 3/5                        |                              |                                                                      | 3/4 vacc (challenge with Pugu I stabilate 119)    | 1/4 vacc (challenge with Pugu I stabilate 119)    |                    | 5/5 controls                                       |                         |                           |
|                                                         | Challenge 4      | 0/5                      | 4/5                        |                              | Overall 0 vacc died from ECF compared to 72% of controls             |                                                   |                                                   |                    |                                                    |                         |                           |
| <b>Lynen 1999</b>                                       | 1                | 0/28                     | 2/5                        | Blood smears and LN biopsies | 14/28 got 30% OTC and 14/28 got 20% OTC                              |                                                   | 21.4% with 20% reduced to 7.1% with 30%           |                    |                                                    |                         |                           |
|                                                         | 2                |                          |                            |                              | 52/104 got 30% and 52/104 got 20% OTC                                |                                                   |                                                   |                    | 44% with 20% reduced to 7.4% with 30%              |                         |                           |
| <b>Lynen 2005</b>                                       | Longitudinal     | 0/50                     | 20/50                      | Post-mortem                  |                                                                      |                                                   |                                                   |                    |                                                    |                         |                           |
|                                                         | Household survey | 1%                       | 37%                        |                              |                                                                      |                                                   |                                                   |                    |                                                    |                         |                           |
| <b>Martins 2010</b>                                     |                  | 1/50                     | 5/50                       | Blood smears and LN biopsies | 97% vaccine efficacy in Endulen, NCA. 6% vacc reacted to vaccination |                                                   |                                                   |                    |                                                    | 1/50                    | 24/50                     |

| Reference    | Study/Trial                                                                                                   | ECF deaths in vaccinated | ECF deaths in unvaccinated | ECF diagnosis                | Other study results                                                                                                                                                                                                                          | Inapparent reaction          | Mild reactions | Moderate reactions | Severe reactions                | ECF cases in vaccinated | ECF cases in unvaccinated |
|--------------|---------------------------------------------------------------------------------------------------------------|--------------------------|----------------------------|------------------------------|----------------------------------------------------------------------------------------------------------------------------------------------------------------------------------------------------------------------------------------------|------------------------------|----------------|--------------------|---------------------------------|-------------------------|---------------------------|
| Melewas 1999 | Tanzania mainland reactions to vacc and ECF deaths first large table) – no controls so can't do meta-analysis |                          |                            |                              | 576/14,628 (3.9%) reactors to vacc and 4 died of anaphylaxis                                                                                                                                                                                 |                              |                |                    |                                 |                         |                           |
|              | Immunisation trial 2                                                                                          | 3/20                     | 2/12                       |                              | Considered inconclusive                                                                                                                                                                                                                      |                              |                |                    |                                 |                         |                           |
|              | Immunisation trial 3                                                                                          | 3/15                     | 7/14                       |                              | Non- or moderate reactors: 8/15 vacc and 7/14 unvaccinated                                                                                                                                                                                   |                              |                |                    | 7/15 vacc and 7/14 unvaccinated |                         |                           |
| Minjauw 1998 |                                                                                                               | 3/46                     | 17/49                      | Blood smears and LN biopsies |                                                                                                                                                                                                                                              | 20/20 vacc and 9/20 non-vacc | 3/20 non-vacc  |                    | 8/20 non-vacc                   |                         |                           |
| Musisi 1989  |                                                                                                               | 0/19                     | 9/15                       | Microscopy and post-mortem   | >70% vacc had detectable schizonts b/w 12-19 days compared to 60% controls. Detectable schizonts in vacc at 20-27 days reduced to 31% and increased to 80% in controls. No schizonts detected in vacc >27d, but detectable in controls until |                              |                |                    |                                 |                         |                           |

| Reference    | Study/Trial                  | ECF deaths in vaccinated | ECF deaths in unvaccinated | ECF diagnosis                | Other study results                                                                                                                                                                  | Inapparent reaction                                                                                       | Mild reactions       | Moderate reactions    | Severe reactions                                                                          | ECF cases in vaccinated | ECF cases in unvaccinated |
|--------------|------------------------------|--------------------------|----------------------------|------------------------------|--------------------------------------------------------------------------------------------------------------------------------------------------------------------------------------|-----------------------------------------------------------------------------------------------------------|----------------------|-----------------------|-------------------------------------------------------------------------------------------|-------------------------|---------------------------|
|              |                              |                          |                            |                              | end of trial (50d)                                                                                                                                                                   |                                                                                                           |                      |                       |                                                                                           |                         |                           |
| Musisi 1996  | Challenge trial              | 1/17                     | 5/12                       | Microscopy and post-mortem   | Mean prepatent period to schizont was $7.9 \pm 1.2$ in controls and $10 \pm 1.2$ in vacc. Duration of detecting schizont was $15.5 \pm 2.3$ in controls and $9.4 \pm 4.1$ in MC vacc | 1 non/mild to moderate reaction in controls and 14 or 15 (unclear) non/mild to moderate in vacc           |                      |                       | 6/12 controls severe (5 fatal) and 3 (also states 2, unclear) of 17 vacc severe (1 fatal) |                         |                           |
| Mutugi 1991  | Immun trial 1                |                          |                            |                              | 37/50 vacc seroconverted                                                                                                                                                             | 37/50 vacc and 17/17 Ab-positive (not vacc) had inapparent reaction to challenge                          | 9/50 vacc            | 3/50 moderate/severe  |                                                                                           |                         |                           |
|              | Homologous challenge 2       |                          |                            |                              |                                                                                                                                                                                      | 48/50 vacc                                                                                                |                      |                       |                                                                                           |                         |                           |
|              | Field challenge 3            | 2/67                     | 1/10                       | Microscopy and post-mortem   |                                                                                                                                                                                      | 82% inapparent reactions (don't know which data these are and actual numbers, and no controls to compare) | 14.9% mild reactions | 2% moderate reactions | 5.9% severe reactions                                                                     |                         |                           |
| Radley 1975c | Trial 1a (Kiambu1 challenge) | 0/5                      | 5/5                        | Blood smears and LN biopsies | Cattle vacc with MC cocktail had mild or no                                                                                                                                          | 3/5 vacc                                                                                                  | 2/5 vacc             |                       | 5/5 controls                                                                              |                         |                           |

| Reference   | Study/Trial                       | ECF deaths in vaccinated | ECF deaths in unvaccinated | ECF diagnosis                | Other study results                                                                                                                    | Inapparent reaction   | Mild reactions          | Moderate reactions | Severe reactions                                              | ECF cases in vaccinated | ECF cases in unvaccinated |
|-------------|-----------------------------------|--------------------------|----------------------------|------------------------------|----------------------------------------------------------------------------------------------------------------------------------------|-----------------------|-------------------------|--------------------|---------------------------------------------------------------|-------------------------|---------------------------|
|             |                                   |                          |                            |                              | reaction to challenge, but variable rx in those vacc with one or two strains only                                                      |                       |                         |                    |                                                               |                         |                           |
|             | Trial 1b (T. lawrencei challenge) |                          |                            |                              |                                                                                                                                        | 2/5 vacc              | 3/5 vacc                |                    | 5/5 controls                                                  |                         |                           |
|             | Trial 2a (Entebbe1 challenge)     | 0/6                      | 3/5                        |                              | Cattle vacc with combination had mild or no reaction to challenge to all three challenges, but susceptible had severe rx and many died |                       | 6/6 vacc                |                    | 5/5 controls                                                  |                         |                           |
|             | Trial 2b (Entebbe2 challenge)     | 0/6                      | 5/5                        |                              |                                                                                                                                        | 1/6 vacc              | 5/6 vacc                |                    | 5/5 controls                                                  |                         |                           |
|             | Trial 2c (Ukunda challenge)       | 0/5                      | 5/5                        |                              |                                                                                                                                        | 1/5 vacc              | 4/5 vacc                |                    | 5/5 controls                                                  |                         |                           |
| Radley 1979 | Expt 1 (T. lawrencei)             | 3/20                     | 18/20                      | Blood smears and LN biopsies |                                                                                                                                        | 2/20 vacc no reaction | 8/20 vacc mild reaction |                    | 20/20 controls severe reaction and 10/20 vacc severe reaction |                         |                           |
|             | Expt 2 (buffalo paddock)          | 3/6                      | 5/6                        |                              |                                                                                                                                        |                       | 2/6 vacc mild reaction  |                    | 6/6 controls severe reaction and 4/6 vacc severe reaction     |                         |                           |

| Reference                                         | Study/Trial                                    | ECF deaths in vaccinated | ECF deaths in unvaccinated | ECF diagnosis                                | Other study results                                                                                                                                                                          | Inapparent reaction | Mild reactions         | Moderate reactions | Severe reactions                                          | ECF cases in vaccinated | ECF cases in unvaccinated |
|---------------------------------------------------|------------------------------------------------|--------------------------|----------------------------|----------------------------------------------|----------------------------------------------------------------------------------------------------------------------------------------------------------------------------------------------|---------------------|------------------------|--------------------|-----------------------------------------------------------|-------------------------|---------------------------|
|                                                   | Expt 3 (groups 3 and 5 only) (buffalo paddock) | 3/5                      | 5/5                        |                                              |                                                                                                                                                                                              |                     | 1/5 vacc mild reaction |                    | 5/5 controls severe reaction and 4/5 vacc severe reaction |                         |                           |
| Radley 1985                                       | Field trial 1                                  | 0/20                     |                            | Blood smears and LN biopsies and post-mortem | Cannot use – control data unclear – 0/10 then 7/7 controls died ECF                                                                                                                          |                     |                        |                    |                                                           |                         |                           |
|                                                   | Field trial 2                                  | 0/19                     | 6/10                       |                                              |                                                                                                                                                                                              |                     |                        |                    |                                                           |                         |                           |
|                                                   | Field trial 3                                  | 0/24                     |                            |                                              | Cannot use – control data unclear – 7/12 then 5 controls died ECF                                                                                                                            |                     |                        |                    |                                                           |                         |                           |
|                                                   | Field trial 4                                  | 3/15                     | 6/8                        |                                              |                                                                                                                                                                                              |                     |                        |                    |                                                           |                         |                           |
| Schreuder 1976 (also presented in Uilenberg 1978) |                                                | 1/9                      | 9/9                        | Serology and microscopy                      |                                                                                                                                                                                              |                     |                        |                    |                                                           |                         |                           |
| Sitt 2015                                         |                                                | 9/12                     | 9/12                       | Post-mortem, microscopy and serology         | No significant difference in survival, disease onset or progression in vacc vs unvacc. All but one vacc seroconverted by day 35 (21-25days) cf all controls which remained negative by ELISA |                     |                        |                    |                                                           |                         |                           |

| Reference                                                  | Study/Trial   | ECF deaths in vaccinated | ECF deaths in unvaccinated | ECF diagnosis                          | Other study results                                                                                                    | Inapparent reaction | Mild reactions | Moderate reactions | Severe reactions | ECF cases in vaccinated                                             | ECF cases in unvaccinated                                        |
|------------------------------------------------------------|---------------|--------------------------|----------------------------|----------------------------------------|------------------------------------------------------------------------------------------------------------------------|---------------------|----------------|--------------------|------------------|---------------------------------------------------------------------|------------------------------------------------------------------|
| Tenesi 2015                                                |               | 0/123                    | 7/119                      | Blood smears and LN biopsies           | No reactors. Vacc efficacy 89.4%. 93% seroconversion                                                                   |                     |                |                    |                  | 2/123 And in follow-up period, 35-150 days, 2 ECF cases (none died) | 18/119 And in follow-up period 35-150 days, 8 ECF cases (7 died) |
| Uilenberg 1976                                             |               | 0/7                      | 5/5                        | Serology, blood smears and LN biopsies | All vacc became infected with T. parva with no symptoms                                                                |                     |                |                    |                  |                                                                     |                                                                  |
| Uilenberg 1977 (also presented in Uilenberg 1978, trial 3) |               | 0/50                     | 19/19                      | Blood smears and LN biopsies           |                                                                                                                        |                     |                |                    |                  |                                                                     |                                                                  |
| Uilenberg 1978                                             | Field trial 1 | 0/7                      | 7/7                        | Serology, blood smears and LN biopsies | This is the only unique dataset – others reported elsewhere                                                            |                     |                |                    |                  |                                                                     |                                                                  |
|                                                            | Field trial 2 | 1/9                      | 9/9                        |                                        | Same data as Schreuder 1976                                                                                            |                     |                |                    |                  |                                                                     |                                                                  |
|                                                            | Field trial 3 |                          |                            |                                        | Same data as Uilenberg 1977                                                                                            |                     |                |                    |                  |                                                                     |                                                                  |
| % Efficacy                                                 |               |                          |                            |                                        |                                                                                                                        |                     |                |                    |                  |                                                                     |                                                                  |
| Kiraithe 2015                                              |               |                          |                            | Blood smears and LN biopsies           | 97.8% efficacy in Ole Naishu and 78.4% in Mutara - buffalo interaction here may have reduced efficacy. Most vaccinated |                     |                |                    |                  | Mutara: 4/65<br>Ole Naishu: 2/65                                    | Mutara: 17/65<br>Ole Naishu: 54/65                               |

| Reference            | Study/Trial | ECF deaths in vaccinated | ECF deaths in unvaccinated | ECF diagnosis                 | Other study results                                                                                                       | Inapparent reaction | Mild reactions                  | Moderate reactions | Severe reactions | ECF cases in vaccinated | ECF cases in unvaccinated |
|----------------------|-------------|--------------------------|----------------------------|-------------------------------|---------------------------------------------------------------------------------------------------------------------------|---------------------|---------------------------------|--------------------|------------------|-------------------------|---------------------------|
|                      |             |                          |                            |                               | seroconverted by day 35. Mutara seroconversion 69% in vacc and 6.2% in controls; 83% Ole Naishu vacc and 3.1% in controls |                     |                                 |                    |                  |                         |                           |
| Lynen 2012           |             |                          |                            | Clinical signs and laboratory | 97.6% efficacy in preventing ECF cases and 97.9% in preventing ECF deaths                                                 |                     |                                 |                    |                  |                         |                           |
| Magwisha 2011        |             |                          |                            | Serology                      | 70% efficacy (proportion +ve animals to total number animals) i.e. 835/1216 (70%) had high antibody titres >20PP          |                     |                                 |                    |                  |                         |                           |
| Martins 2010 (AGAIN) |             | 1/50                     | 5/50                       | Blood smears and LN biopsies  | 97% vaccine efficacy. 6% vacc reacted to vaccination                                                                      |                     |                                 |                    |                  | 1/50                    | 24/50                     |
| Nsubuga-Mutaka 1999  |             |                          |                            | Blood smears and serology     | 86% protection. 0.16% mortality in vacc                                                                                   |                     | 91% vacc mild-moderate reaction |                    |                  |                         |                           |
| Nsubuga-Mutaka 2000  | 1990-1993   |                          |                            |                               | 80% protection. 94% seroconversion. 90% safety                                                                            |                     |                                 |                    |                  |                         |                           |

| Reference             | Study/Trial | ECF deaths in vaccinated | ECF deaths in unvaccinated | ECF diagnosis                | Other study results                                                                                                                                                                        | Inapparent reaction | Mild reactions                                                 | Moderate reactions | Severe reactions | ECF cases in vaccinated                                             | ECF cases in unvaccinated                                        |
|-----------------------|-------------|--------------------------|----------------------------|------------------------------|--------------------------------------------------------------------------------------------------------------------------------------------------------------------------------------------|---------------------|----------------------------------------------------------------|--------------------|------------------|---------------------------------------------------------------------|------------------------------------------------------------------|
|                       | 1994-1998   |                          |                            |                              | 86% seroconversion and 90% <b>safety</b>                                                                                                                                                   |                     |                                                                |                    |                  |                                                                     |                                                                  |
| Tenesi 2015 (AGAIN)   |             | 0/123                    | 7/119                      | Blood smears and LN biopsies | No reactors. Vacc efficacy 89.4%. 93% seroconversion.                                                                                                                                      |                     |                                                                |                    |                  | 2/123 And in follow-up period, 35-150 days, 2 ECF cases (none died) | 18/119 And in follow-up period 35-150 days, 8 ECF cases (7 died) |
| <b>Seroconversion</b> |             |                          |                            |                              |                                                                                                                                                                                            |                     |                                                                |                    |                  |                                                                     |                                                                  |
| Anon 1998             |             |                          |                            | Blood smears and LN biopsies | High proportion of seroconversion by 30 days (93.9% given 1:80 dose, and 84% given 1:100 dose). No reactions with either dose – both considered safe. Preferential use of the 30 mg/kg OTC |                     |                                                                |                    |                  |                                                                     |                                                                  |
| Anon 1999a            |             |                          |                            | Blood smears and LN biopsies | 95% seroconversion with FAO2 and 100% seroconversion with FAO1 by <b>day 45</b> (immunity onset) in both groups. 30mg/kg OTC                                                               |                     | Only 1/31 with FAO1. No other reactors for either FAO1 or FAO2 |                    |                  |                                                                     |                                                                  |

| Reference             | Study/Trial | ECF deaths in vaccinated | ECF deaths in unvaccinated | ECF diagnosis                | Other study results                                                                                                                                                                                                                              | Inapparent reaction              | Mild reactions | Moderate reactions | Severe reactions                 | ECF cases in vaccinated          | ECF cases in unvaccinated          |
|-----------------------|-------------|--------------------------|----------------------------|------------------------------|--------------------------------------------------------------------------------------------------------------------------------------------------------------------------------------------------------------------------------------------------|----------------------------------|----------------|--------------------|----------------------------------|----------------------------------|------------------------------------|
|                       |             |                          |                            |                              | preferable in reducing reactions                                                                                                                                                                                                                 |                                  |                |                    |                                  |                                  |                                    |
| Atuhaire 2020a        |             |                          |                            | Blood smears and LN biopsies | 35/41 vacc seroconverted (85.4%). Vaccine efficacy calculated as $(32/40) - (6/41) \div (32/40) = 81.7\%$                                                                                                                                        | 25/41 vacc and 5/41 unvaccinated |                |                    | 6/41 vacc and 32/40 unvaccinated |                                  |                                    |
| Kazungu 2015          |             |                          |                            | Serology                     | 99.2% seroprevalence in vaccinated and 96% seroprevalence in unvaccinated                                                                                                                                                                        |                                  |                |                    |                                  |                                  |                                    |
| Kiraithe 2015 (AGAIN) |             |                          |                            | Blood smears and LN biopsies | 97.8% efficacy in Ole Naishu and 78.4% in Mutara - buffalo interaction here may have reduced efficacy. Most vaccinated seroconverted by day 35. Mutara seroconversion 69% in vacc and 6.2% in controls; 83% Ole Naishu vacc and 3.1% in controls |                                  |                |                    |                                  | Mutara: 4/65<br>Ole Naishu: 2/65 | Mutara: 17/65<br>Ole Naishu: 54/65 |

| Reference    | Study/Trial | ECF deaths in vaccinated | ECF deaths in unvaccinated | ECF diagnosis                   | Other study results                                                                                                                                                                                                                                                                                    | Inapparent reaction | Mild reactions                            | Moderate reactions | Severe reactions                                                                                                    | ECF cases in vaccinated | ECF cases in unvaccinated |
|--------------|-------------|--------------------------|----------------------------|---------------------------------|--------------------------------------------------------------------------------------------------------------------------------------------------------------------------------------------------------------------------------------------------------------------------------------------------------|---------------------|-------------------------------------------|--------------------|---------------------------------------------------------------------------------------------------------------------|-------------------------|---------------------------|
| Mbassa 1998  |             |                          |                            | Blood smears and LN biopsies    | 38 of those immunized with -70C for 6 months were tested and had seroconverted by day 30. i.e. of those tested, 100% seroconversion by day 30. 1 calf given -70C for 6 weeks died from ECF. Other calf given -70 for 6 weeks, plus both calves given -70C for 6 months recovered without any treatment |                     |                                           |                    | 1 severe in calf vacc (with -70 for 6 months) and died from disease other than ECF after monitoring period (day 24) |                         |                           |
| Patel 2019   |             |                          |                            | Blood smears and clinical signs | 75-87% (mean 82%) seroconversion (in 62 vacc) [but no controls, but 2 ECF cases in non-vacc animals]                                                                                                                                                                                                   |                     | 4/5 vacc (group 1) and 4/5 vacc (group 2) | 1/5 group 2 vacc   | 2/2 controls and 1/10 vacc (group 1)                                                                                |                         | 2 non-vacc                |
| Turasha 2011 |             |                          |                            | Blood and LN smears             | Seroconversion after vacc was estimated at 73% (55.6-79.4% range, and mean 69.62%).                                                                                                                                                                                                                    |                     |                                           |                    |                                                                                                                     |                         |                           |

| Reference    | Study/Trial | ECF deaths in vaccinated | ECF deaths in unvaccinated | ECF diagnosis       | Other study results                                                                                                                                                                                                                              | Inapparent reaction | Mild reactions | Moderate reactions | Severe reactions | ECF cases in vaccinated                                                                                                                          | ECF cases in unvaccinated                               |
|--------------|-------------|--------------------------|----------------------------|---------------------|--------------------------------------------------------------------------------------------------------------------------------------------------------------------------------------------------------------------------------------------------|---------------------|----------------|--------------------|------------------|--------------------------------------------------------------------------------------------------------------------------------------------------|---------------------------------------------------------|
|              |             |                          |                            |                     | Pre-vacc 19.92 seroprev compared to 69.62 post-vacc seroprev i.e. good mean seroconversion. 17/3,017 vaccinated reacted (0.5%) and were treated for ECF and 3 (0.1%) died. Severity of reactors was not recorded and cause of deaths not certain |                     |                |                    |                  |                                                                                                                                                  |                                                         |
| Wesonga 2013 |             |                          |                            | Blood and LN smears | Mutara and Old Naishu used MC vacc. Ol Pejeta uses 'natural immunisation'. In Mutara, pre-vacc was 3% and post-vacc seropos was 69%. In Ole Naishu, 1.6% pre-vac and 83% post-vacc. In Ol pejeta 2.9% pre-vacc and 51% post-vacc. For controls:  |                     |                |                    |                  | 0/66 vacc at Mutara and 0/65 vacc at Ole Naishu. 4 vacc at Ol Pejeta but not sure out of how many (100?) and no controls as all treated the same | 3/65 controls at Mutara and 0/66 controls at Ole Naishu |

| Reference                                             | Study/Trial                    | ECF deaths in vaccinated | ECF deaths in unvaccinated | ECF diagnosis                | Other study results                                                                                       | Inapparent reaction                               | Mild reactions                                    | Moderate reactions | Severe reactions                                   | ECF cases in vaccinated | ECF cases in unvaccinated |
|-------------------------------------------------------|--------------------------------|--------------------------|----------------------------|------------------------------|-----------------------------------------------------------------------------------------------------------|---------------------------------------------------|---------------------------------------------------|--------------------|----------------------------------------------------|-------------------------|---------------------------|
|                                                       |                                |                          |                            |                              | In Mutura, 4.7% seropos at day 0 then 6.3% at day 35<br>In Ole Naishu, 3.1% day 0 then 3.1% at day 35     |                                                   |                                                   |                    |                                                    |                         |                           |
| <b>Severe reactions</b>                               |                                |                          |                            |                              |                                                                                                           |                                                   |                                                   |                    |                                                    |                         |                           |
| Atuhaire 2020a (AGAIN)                                |                                |                          |                            | Blood smears and LN biopsies | 35/41 vacc seroconverted (85.4%). Vaccine efficacy calculated as $(32/40) - (6/41) \div (32/40) = 81.7\%$ | 25/41 vacc and 5/41 unvaccinated                  |                                                   |                    | 6/41 vacc and 32/40 unvaccinated                   |                         |                           |
| Bishop 2015                                           |                                |                          |                            | Blood and LN smears          | 27 FAO1 immun and 27 controls                                                                             | 5/27 vacc and 6/27 controls                       | 5/27 vacc and 7/27 controls                       | 1/27 vacc          | 14/27 vacc and 14/27 controls                      |                         |                           |
| Dolan 1980 (separated into Dolan a, b, c & d) (AGAIN) | Challenge 1                    | 0/5                      | 3/4                        | Microscopy and LN biopsy     |                                                                                                           | 1/5 vacc (challenge with Idobogo stabilate 89)    | 4/5 vacc (challenge with Idobogo stabilate 89)    |                    | 4/4 controls (challenge with Idobogo stabilate 89) |                         |                           |
|                                                       | Challenge 2                    | 0/5                      | 3/4                        |                              |                                                                                                           | 3/5 vacc (challenge with Idobogo II stabilate 90) | 2/5 vacc (challenge with Idobogo II stabilate 90) |                    | 4/4 controls                                       |                         |                           |
|                                                       | Challenge 3                    | 0/4                      | 3/5                        |                              |                                                                                                           | 3/4 vacc (challenge with Pugu I stabilate 119)    | 1/4 vacc (challenge with Pugu I stabilate 119)    |                    | 5/5 controls                                       |                         |                           |
|                                                       | Challenge 4                    | 0/5                      | 4/5                        |                              | Overall 0 vacc died from ECF compared to 72% of controls                                                  |                                                   |                                                   |                    |                                                    |                         |                           |
| Melewas 1999 (AGAIN)                                  | Tanzania mainland reactions to |                          |                            |                              | 576/14,628 (3.9%) reactors to vacc and 4                                                                  |                                                   |                                                   |                    |                                                    |                         |                           |

| Reference            | Study/Trial                                                                    | ECF deaths in vaccinated | ECF deaths in unvaccinated | ECF diagnosis                   | Other study results                                                                                                                                                                  | Inapparent reaction                                                                             | Mild reactions                            | Moderate reactions | Severe reactions                                                                          | ECF cases in vaccinated | ECF cases in unvaccinated |
|----------------------|--------------------------------------------------------------------------------|--------------------------|----------------------------|---------------------------------|--------------------------------------------------------------------------------------------------------------------------------------------------------------------------------------|-------------------------------------------------------------------------------------------------|-------------------------------------------|--------------------|-------------------------------------------------------------------------------------------|-------------------------|---------------------------|
|                      | vacc and ECF deaths first large table) – no controls so can't do meta-analysis |                          |                            |                                 | died of anaphylaxis                                                                                                                                                                  |                                                                                                 |                                           |                    |                                                                                           |                         |                           |
|                      | Immunisation trial 2                                                           | 3/20                     | 2/12                       |                                 | Considered inconclusive                                                                                                                                                              |                                                                                                 |                                           |                    |                                                                                           |                         |                           |
|                      | Immunisation trial 3                                                           | 3/15                     | 7/14                       |                                 | Non- or moderate reactors: 8/15 vacc and 7/14 unvaccinated                                                                                                                           |                                                                                                 |                                           |                    | 7/15 vacc and 7/14 unvaccinated                                                           |                         |                           |
| Minjauw 1998 (AGAIN) |                                                                                | 3/46                     | 17/49                      | Blood smears and LN biopsies    |                                                                                                                                                                                      | 20/20 vacc and 9/20 non-vacc                                                                    | 3/20 non-vacc                             |                    | 8/20 non-vacc                                                                             |                         |                           |
| Musisi 1996 (AGAIN)  | Challenge trial                                                                | 1/17                     | 5/12                       | Microscopy and post-mortem      | Mean prepatent period to schizont was $7.9 \pm 1.2$ in controls and $10 \pm 1.2$ in vacc. Duration of detecting schizont was $15.5 \pm 2.3$ in controls and $9.4 \pm 4.1$ in MC vacc | 1 non/mild to moderate reaction in controls and 14 or 15 (unclear) non/mild to moderate in vacc |                                           |                    | 6/12 controls severe (5 fatal) and 3 (also states 2, unclear) of 17 vacc severe (1 fatal) |                         |                           |
| Patel 2019 (AGAIN)   |                                                                                |                          |                            | Blood smears and clinical signs | 75-87% (mean 82%) seroconversion (in 62 vacc) [but no controls, but 2 ECF cases in non-vacc animals]                                                                                 |                                                                                                 | 4/5 vacc (group 1) and 4/5 vacc (group 2) | 1/5 group 2 vacc   | 2/2 controls and 1/10 vacc (group 1)                                                      |                         | 2 non-vacc                |

| Reference                   | Study/Trial                       | ECF deaths in vaccinated | ECF deaths in unvaccinated | ECF diagnosis                | Other study results                                                                                                                    | Inapparent reaction   | Mild reactions          | Moderate reactions | Severe reactions                                              | ECF cases in vaccinated | ECF cases in unvaccinated |
|-----------------------------|-----------------------------------|--------------------------|----------------------------|------------------------------|----------------------------------------------------------------------------------------------------------------------------------------|-----------------------|-------------------------|--------------------|---------------------------------------------------------------|-------------------------|---------------------------|
| <b>Radley 1975c (AGAIN)</b> | Trial 1a (Kiambu1 challenge)      | 0/5                      | 5/5                        | Blood smears and LN biopsies | Cattle vacc with MC cocktail had mild or no reaction to challenge, but variable rx in those vacc with one or two strains only          | 3/5 vacc              | 2/5 vacc                |                    | 5/5 controls                                                  |                         |                           |
|                             | Trial 1b (T. lawrencei challenge) |                          |                            |                              |                                                                                                                                        | 2/5 vacc              | 3/5 vacc                |                    | 5/5 controls                                                  |                         |                           |
|                             | Trial 2a (Entebbe1 challenge)     | 0/6                      | 3/5                        |                              | Cattle vacc with combination had mild or no reaction to challenge to all three challenges, but susceptible had severe rx and many died |                       | 6/6 vacc                |                    | 5/5 controls                                                  |                         |                           |
|                             | Trial 2b (Entebbe2 challenge)     | 0/6                      | 5/5                        |                              |                                                                                                                                        | 1/6 vacc              | 5/6 vacc                |                    | 5/5 controls                                                  |                         |                           |
|                             | Trial 2c (Ukunda challenge)       | 0/5                      | 5/5                        |                              |                                                                                                                                        | 1/5 vacc              | 4/5 vacc                |                    | 5/5 controls                                                  |                         |                           |
| <b>Radley 1979 (AGAIN)</b>  | Expt 1 (T. lawrencei)             | 3/20                     | 18/20                      | Blood smears and LN biopsies |                                                                                                                                        | 2/20 vacc no reaction | 8/20 vacc mild reaction |                    | 20/20 controls severe reaction and 10/20 vacc severe reaction |                         |                           |
|                             | Expt 2 (buffalo paddock)          | 3/6                      | 5/6                        |                              |                                                                                                                                        |                       | 2/6 vacc mild reaction  |                    | 6/6 controls severe reaction and 4/6 vacc                     |                         |                           |

| Reference                 | Study/Trial                                    | ECF deaths in vaccinated | ECF deaths in unvaccinated | ECF diagnosis                | Other study results                                                                                                                                                                        | Inapparent reaction | Mild reactions         | Moderate reactions | Severe reactions                                                             | ECF cases in vaccinated | ECF cases in unvaccinated |
|---------------------------|------------------------------------------------|--------------------------|----------------------------|------------------------------|--------------------------------------------------------------------------------------------------------------------------------------------------------------------------------------------|---------------------|------------------------|--------------------|------------------------------------------------------------------------------|-------------------------|---------------------------|
|                           | Expt 3 (groups 3 and 5 only) (buffalo paddock) | 3/5                      | 5/5                        |                              |                                                                                                                                                                                            |                     | 1/5 vacc mild reaction |                    | severe reaction<br>5/5 controls severe reaction and 4/5 vacc severe reaction |                         |                           |
| <b>Onset of immunity</b>  |                                                |                          |                            |                              |                                                                                                                                                                                            |                     |                        |                    |                                                                              |                         |                           |
| <b>Anon 1998 (AGAIN)</b>  |                                                |                          |                            | Blood smears and LN biopsies | High proportion of seroconversion by 30 days (93.9% given 1:80 dose, and 84% given 1:100 dose). No reactions with either dose – both considered safe. Preferential use of the 30 mg/kg OTC |                     |                        |                    |                                                                              |                         |                           |
| <b>Anon 1999a (AGAIN)</b> |                                                |                          |                            | Blood smears and LN biopsies | 95% and 100% Seroconversion by 45 days. Safety of both vaccs at 1:80 dilution with OTC 30mg/kg. 30mg/kg OTC preferable in reducing reactions                                               |                     |                        |                    |                                                                              |                         |                           |
| <b>Anon 1999b</b>         |                                                |                          |                            | Lymph smears and serology    | Seroconversion between 28 and 35 days                                                                                                                                                      |                     |                        |                    |                                                                              |                         |                           |

| Reference             | Study/Trial | ECF deaths in vaccinated | ECF deaths in unvaccinated | ECF diagnosis                | Other study results                                                                                                                                                                                                                                       | Inapparent reaction | Mild reactions | Moderate reactions | Severe reactions | ECF cases in vaccinated          | ECF cases in unvaccinated          |
|-----------------------|-------------|--------------------------|----------------------------|------------------------------|-----------------------------------------------------------------------------------------------------------------------------------------------------------------------------------------------------------------------------------------------------------|---------------------|----------------|--------------------|------------------|----------------------------------|------------------------------------|
| Kiraithe 2015 (AGAIN) |             |                          |                            | Blood smears and LN biopsies | 97.8% efficacy in Ole Naishu and 78.4% in Mutara – buffalo interaction here may have reduced efficacy. Most vaccinated seroconverted by day 35. Mutara seroconversion 69% in vacc and 6.2% in controls; 83% Ole Naishu vacc and 3.1% in controls          |                     |                |                    |                  | Mutara: 4/65<br>Ole Naishu: 2/65 | Mutara: 17/65<br>Ole Naishu: 54/65 |
| Oura 2004             |             |                          |                            | Serology and PCR             | Seroconversion occurred by 48 days (in 13 of 15 calves, 87%). Muguga/ Serengeti stock present at d48 but not d87, although present in one calf at d241 and d303 [Muguga and Serengeti largely eliminated by 3 months] Kiambu5 persisted in vacc cattle at |                     |                |                    |                  |                                  |                                    |

| Reference            | Study/Trial | ECF deaths in vaccinated | ECF deaths in unvaccinated | ECF diagnosis                        | Other study results                                                                                                                                                                                                   | Inapparent reaction | Mild reactions | Moderate reactions | Severe reactions | ECF cases in vaccinated | ECF cases in unvaccinated |
|----------------------|-------------|--------------------------|----------------------------|--------------------------------------|-----------------------------------------------------------------------------------------------------------------------------------------------------------------------------------------------------------------------|---------------------|----------------|--------------------|------------------|-------------------------|---------------------------|
|                      |             |                          |                            |                                      | d48 and d303 (62%). No evidence of transmission to unvacc cattle over a 1-year period                                                                                                                                 |                     |                |                    |                  |                         |                           |
| Sitt 2015            |             | 9/12                     | 9/12                       | Post-mortem, microscopy and serology | No significant difference in survival, disease onset or progression in vacc vs unvacc. All but one vacc seroconverted by day 35 (21-25days) cf all controls which remained negative by ELISA                          |                     |                |                    |                  |                         |                           |
| Duration of immunity |             |                          |                            |                                      |                                                                                                                                                                                                                       |                     |                |                    |                  |                         |                           |
| Oura 2004 (AGAIN)    |             |                          |                            | Serology and PCR                     | Seroconversion occurred by 48 days (in 13 of 15 calves, 87%). Muguga/ Serengeti stock present at d48 but not d87, although present in one calf at d241 and d303 [Muguga and Serengeti largely eliminated by 3 months] |                     |                |                    |                  |                         |                           |

| Reference                  | Study/Trial | ECF deaths in vaccinated | ECF deaths in unvaccinated | ECF diagnosis                | Other study results                                                                                                                                                   | Inapparent reaction         | Mild reactions              | Moderate reactions | Severe reactions              | ECF cases in vaccinated          | ECF cases in unvaccinated          |
|----------------------------|-------------|--------------------------|----------------------------|------------------------------|-----------------------------------------------------------------------------------------------------------------------------------------------------------------------|-----------------------------|-----------------------------|--------------------|-------------------------------|----------------------------------|------------------------------------|
|                            |             |                          |                            |                              | Kiambu5 persisted in vacc cattle at d48 and d303 (62%). No evidence of transmission to unvacc cattle over a 1-year period                                             |                             |                             |                    |                               |                                  |                                    |
| <b>Efficacy vs buffalo</b> |             |                          |                            |                              |                                                                                                                                                                       |                             |                             |                    |                               |                                  |                                    |
| Bishop 2015 (AGAIN)        |             |                          |                            | Blood and LN smears          | 27 FAO1 immun and 27 controls                                                                                                                                         | 5/27 vacc and 6/27 controls | 5/27 vacc and 7/27 controls | 1/27 vacc          | 14/27 vacc and 14/27 controls |                                  |                                    |
| Di Giulio 2009             |             |                          |                            |                              | 95% reduction in overall calf mortality in NCA since vaccination (intense wildlife area) and 95% reduced calf mortality at TZ-Kenya border areas                      |                             |                             |                    |                               |                                  |                                    |
| Kiraithe 2015 (AGAIN)      |             |                          |                            | Blood smears and LN biopsies | 97.8% efficacy in Ole Naishu and 78.4% in Mutara – buffalo interaction here may have reduced efficacy. Most vaccinated seroconverted by day 35. Mutara seroconversion |                             |                             |                    |                               | Mutara: 4/65<br>Ole Naishu: 2/65 | Mutara: 17/65<br>Ole Naishu: 54/65 |

| Reference            | Study/Trial | ECF deaths in vaccinated | ECF deaths in unvaccinated | ECF diagnosis                 | Other study results                                                                                                                                                                       | Inapparent reaction | Mild reactions | Moderate reactions | Severe reactions | ECF cases in vaccinated | ECF cases in unvaccinated |
|----------------------|-------------|--------------------------|----------------------------|-------------------------------|-------------------------------------------------------------------------------------------------------------------------------------------------------------------------------------------|---------------------|----------------|--------------------|------------------|-------------------------|---------------------------|
|                      |             |                          |                            |                               | 69% in vacc and 6.2% in controls; 83% Ole Naishu vacc and 3.1% in controls                                                                                                                |                     |                |                    |                  |                         |                           |
| Martins 2010 (AGAIN) |             | 1/50                     | 5/50                       | Blood smears and LN biopsies  | 97% vaccine efficacy in Endulen, NCA. 6% vacc reacted to vaccination                                                                                                                      |                     |                |                    |                  | 1/50                    | 24/50                     |
| Obara 2015           |             |                          |                            | Clinical signs and microscopy | 53/113 developed clinical and parasitological features typical with buffalo-derived T. parva. [Shared field samples with Bishop 2015 & Pelle 2011]                                        |                     |                |                    |                  |                         |                           |
| Pelle 2011           |             |                          |                            | LN biopsies                   | findings consistent with results of vacc studies, with evidence that immunity by ITM with a mixture of parasites is not always effective against challenge with buffalo-derived parasites |                     |                |                    |                  |                         |                           |

| Reference           | Study/Trial                                    | ECF deaths in vaccinated | ECF deaths in unvaccinated | ECF diagnosis                        | Other study results                                                                                                                                                                          | Inapparent reaction   | Mild reactions          | Moderate reactions | Severe reactions                                              | ECF cases in vaccinated | ECF cases in unvaccinated |
|---------------------|------------------------------------------------|--------------------------|----------------------------|--------------------------------------|----------------------------------------------------------------------------------------------------------------------------------------------------------------------------------------------|-----------------------|-------------------------|--------------------|---------------------------------------------------------------|-------------------------|---------------------------|
| Radley 1979 (AGAIN) | Expt 1 (T. lawrencei)                          | 3/20                     | 18/20                      | Blood smears and LN biopsies         |                                                                                                                                                                                              | 2/20 vacc no reaction | 8/20 vacc mild reaction |                    | 20/20 controls severe reaction and 10/20 vacc severe reaction |                         |                           |
|                     | Expt 2 (buffalo paddock)                       | 3/6                      | 5/6                        |                                      |                                                                                                                                                                                              |                       | 2/6 vacc mild reaction  |                    | 6/6 controls severe reaction and 4/6 vacc severe reaction     |                         |                           |
|                     | Expt 3 (groups 3 and 5 only) (buffalo paddock) | 3/5                      | 5/5                        |                                      |                                                                                                                                                                                              |                       | 1/5 vacc mild reaction  |                    | 5/5 controls severe reaction and 4/5 vacc severe reaction     |                         |                           |
| Sitt 2015 (AGAIN)   |                                                | 9/12                     | 9/12                       | Post-mortem, microscopy and serology | No significant difference in survival, disease onset or progression in vacc vs unvacc. All but one vacc seroconverted by day 35 (21-25days) of all controls which remained negative by ELISA |                       |                         |                    |                                                               |                         |                           |
| Turasha 2005        |                                                | 46/4000 (1.1%)           |                            |                                      | Mortality reduced to 1.1% from 20-40%. Overall reactor rate is 87 calves                                                                                                                     |                       |                         |                    |                                                               |                         |                           |

| Reference                                     | Study/Trial | ECF deaths in vaccinated | ECF deaths in unvaccinated | ECF diagnosis | Other study results                                                                                                                                                                                                            | Inapparent reaction | Mild reactions | Moderate reactions | Severe reactions | ECF cases in vaccinated | ECF cases in unvaccinated |
|-----------------------------------------------|-------------|--------------------------|----------------------------|---------------|--------------------------------------------------------------------------------------------------------------------------------------------------------------------------------------------------------------------------------|---------------------|----------------|--------------------|------------------|-------------------------|---------------------------|
|                                               |             |                          |                            |               | (2.2%). MC vacc found to be safe and protective. Protects where buffalo exist                                                                                                                                                  |                     |                |                    |                  |                         |                           |
| Vaccine efficacy as a statement / qualitative |             |                          |                            |               |                                                                                                                                                                                                                                |                     |                |                    |                  |                         |                           |
| Akoolo 2008                                   |             |                          |                            |               | solid resistance to challenge with a potentially lethal dose of vaccine batch FAO-1 after vaccination with FAO-1                                                                                                               |                     |                |                    |                  |                         |                           |
| Anon 2007                                     |             |                          |                            |               | very high degree of vaccine efficacy, based on a 90% reduction in ECF morbidity/mortality in ECF endemic areas following vacc with batch FAO1 in TZ and vaccine FAO-1 was accepted as safe in Tanzania. 30mg/kg OTC preferable |                     |                |                    |                  |                         |                           |
| Homewood 2006                                 |             |                          |                            |               | "highly significant impact on survival" following use of                                                                                                                                                                       |                     |                |                    |                  |                         |                           |

| Reference           | Study/Trial       | ECF deaths in vaccinated | ECF deaths in unvaccinated | ECF diagnosis                    | Other study results                                                                                                                                                   | Inapparent reaction                      | Mild reactions                                         | Moderate reactions | Severe reactions  | ECF cases in vaccinated | ECF cases in unvaccinated |
|---------------------|-------------------|--------------------------|----------------------------|----------------------------------|-----------------------------------------------------------------------------------------------------------------------------------------------------------------------|------------------------------------------|--------------------------------------------------------|--------------------|-------------------|-------------------------|---------------------------|
|                     |                   |                          |                            |                                  | the MC ITM vaccine. Probability of a vacc animal surviving to 54 months was 97%, cf to 71% for those unvacc, and reduced calf mortality due to ECF from >20% to ~ 2%. |                                          |                                                        |                    |                   |                         |                           |
| Mutugi 1997         |                   |                          |                            | Blood and LN smears and serology | Direct evidence of efficacy of 1:80 dose of FAO-1 vs experimental challenge. 1:80 dose safe in terms of survival and few reactions                                    |                                          |                                                        |                    |                   |                         |                           |
| Mutugi date unknown |                   | 5 (0.01%)                |                            |                                  | 90% reduction in morbidity/mortality in Tanzania. No safety issues re. pregnant, lactating, breed, age, sex. No reactions in calves                                   |                                          |                                                        | 2,700 (7%) vacc    | 1,000 (2.7%) vacc |                         |                           |
| Patel 2016          | Stage 1 immunized |                          |                            | Blood smears, serology and PCR   | Severe reactions observed in all animals given undiluted                                                                                                              | 1/5 (1:80)<br>1/5 (1:120)<br>1/5 (1:160) | 5/5 (1:40)<br>4/5 (1:80)<br>4/5 (1:120)<br>4/5 (1:160) |                    |                   |                         |                           |

| Reference | Study/Trial        | ECF deaths in vaccinated | ECF deaths in unvaccinated | ECF diagnosis | Other study results                                                                                                                                                                                                                                   | Inapparent reaction                                     | Mild reactions                                          | Moderate reactions | Severe reactions                         | ECF cases in vaccinated | ECF cases in unvaccinated |
|-----------|--------------------|--------------------------|----------------------------|---------------|-------------------------------------------------------------------------------------------------------------------------------------------------------------------------------------------------------------------------------------------------------|---------------------------------------------------------|---------------------------------------------------------|--------------------|------------------------------------------|-------------------------|---------------------------|
|           |                    |                          |                            |               | vaccine and all given dilutions from 1:10 to 1:80, with remaining animals undergoing mild or inapparent reactions. All control animals severe reactions to challenge. Concluded that 1ml of a 1:100 vaccine dose considered both safe and efficacious |                                                         |                                                         |                    |                                          |                         |                           |
|           | Stage 1 challenged |                          |                            |               |                                                                                                                                                                                                                                                       | 5/5 (1:40)<br>3/5 (1:80)<br>4/5 (1:120)<br>4/5 (1:160)  | 2/5 (1:80)<br>1/5 (1:120)                               |                    | 1/5 (1:160)                              |                         |                           |
|           | Stage 2 immunized  |                          |                            |               |                                                                                                                                                                                                                                                       | 3/5 (1:80)<br>4/5 (1:100)<br>2/5 (1:120)<br>3/5 (1:140) | 1/5 (1:80)<br>1/5 (1:100)<br>2/5 (1:120)<br>2/5 (1:140) | 1/5 (1:120)        | 1/5 (1:80)                               |                         |                           |
|           | Stage 2 challenged |                          |                            |               |                                                                                                                                                                                                                                                       | 1/5 (1:80)<br>3/5 (1:120)<br>1/5 (1:140)                | 1/5 (1:80)<br>3/5 (1:100)<br>2/5 (1:120)<br>2/5 (1:140) |                    | 3/5 (1:80)<br>2/5 (1:100)<br>2/5 (1:140) |                         |                           |
|           | Stage 3 immunized  |                          |                            |               |                                                                                                                                                                                                                                                       | 1/5 (1:80)<br>1/5 (1:100)<br>1/5 (1:120)                | 4/5 (1:100)<br>4/5 (1:120)<br>5/5 (1:140)               | 4/5 (1:80)         |                                          |                         |                           |
|           | Stage 3 challenged |                          |                            |               |                                                                                                                                                                                                                                                       | 1/5 (1:100)<br>1/5 (1:120)                              | 5/5 (1:80)<br>4/5 (1:100)<br>4/5 (1:120)                |                    |                                          |                         |                           |

| Reference            | Study/Trial                       | ECF deaths in vaccinated | ECF deaths in unvaccinated | ECF diagnosis                | Other study results                                                                                                                    | Inapparent reaction     | Mild reactions | Moderate reactions | Severe reactions            | ECF cases in vaccinated | ECF cases in unvaccinated |
|----------------------|-----------------------------------|--------------------------|----------------------------|------------------------------|----------------------------------------------------------------------------------------------------------------------------------------|-------------------------|----------------|--------------------|-----------------------------|-------------------------|---------------------------|
| Radley 1975c (AGAIN) | Trial 1a (Kiambu1 challenge)      | 0/5                      | 5/5                        | Blood smears and LN biopsies | Cattle vacc with MC cocktail had mild or no reaction to challenge, but variable rx in those vacc with one or two strains only          | 4/5 (1:140)<br>3/5 vacc | 2/5 vacc       |                    | 1/5 (1:140)<br>5/5 controls |                         |                           |
|                      | Trial 1b (T. lawrencei challenge) |                          |                            |                              |                                                                                                                                        | 2/5 vacc                | 3/5 vacc       |                    | 5/5 controls                |                         |                           |
|                      | Trial 2a (Entebbe1 challenge)     | 0/6                      | 3/5                        |                              | Cattle vacc with combination had mild or no reaction to challenge to all three challenges, but susceptible had severe rx and many died |                         | 6/6 vacc       |                    | 5/5 controls                |                         |                           |
|                      | Trial 2b (Entebbe2 challenge)     | 0/6                      | 5/5                        |                              |                                                                                                                                        | 1/6 vacc                | 5/6 vacc       |                    | 5/5 controls                |                         |                           |
|                      | Trial 2c (Ukunda challenge)       | 0/5                      | 5/5                        |                              |                                                                                                                                        | 1/5 vacc                | 4/5 vacc       |                    | 5/5 controls                |                         |                           |
| Steinaa 2018         |                                   |                          |                            | Clinical signs               | no substantive difference in protection, with no broader a CTL response when using the cocktail, suggesting limited antigenic          |                         |                |                    |                             |                         |                           |

| Reference                           | Study/Trial | ECF deaths in vaccinated | ECF deaths in unvaccinated | ECF diagnosis                | Other study results                                                                                                                                                                                                                                                                                    | Inapparent reaction | Mild reactions | Moderate reactions | Severe reactions                                                                                                    | ECF cases in vaccinated | ECF cases in unvaccinated |
|-------------------------------------|-------------|--------------------------|----------------------------|------------------------------|--------------------------------------------------------------------------------------------------------------------------------------------------------------------------------------------------------------------------------------------------------------------------------------------------------|---------------------|----------------|--------------------|---------------------------------------------------------------------------------------------------------------------|-------------------------|---------------------------|
|                                     |             |                          |                            |                              | diversity in the cocktail                                                                                                                                                                                                                                                                              |                     |                |                    |                                                                                                                     |                         |                           |
| Temperature and efficacy            |             |                          |                            |                              |                                                                                                                                                                                                                                                                                                        |                     |                |                    |                                                                                                                     |                         |                           |
| Atuhaire 2020b                      |             |                          |                            | Blood and LN smears          | No reduction in efficacy when stored at -80C for <30 days                                                                                                                                                                                                                                              |                     |                |                    |                                                                                                                     |                         |                           |
| Mbassa 1998 (AGAIN)                 |             |                          |                            | Blood smears and LN biopsies | 38 of those immunized with -70C for 6 months were tested and had seroconverted by day 30. i.e. of those tested, 100% seroconversion by day 30. 1 calf given -70C for 6 weeks died from ECF. Other calf given -70 for 6 weeks, plus both calves given -70C for 6 months recovered without any treatment |                     |                |                    | 1 severe in calf vacc (with -70 for 6 months) and died from disease other than ECF after monitoring period (day 24) |                         |                           |
| Shed & Spread studies               |             |                          |                            |                              |                                                                                                                                                                                                                                                                                                        |                     |                |                    |                                                                                                                     |                         |                           |
| Safety as a statement / qualitative |             |                          |                            |                              |                                                                                                                                                                                                                                                                                                        |                     |                |                    |                                                                                                                     |                         |                           |
| Anon 2007 (AGAIN)                   |             |                          |                            |                              | very high degree of vaccine efficacy, based on a 90% reduction in ECF morbidity/                                                                                                                                                                                                                       |                     |                |                    |                                                                                                                     |                         |                           |

| Reference          | Study/Trial | ECF deaths in vaccinated | ECF deaths in unvaccinated | ECF diagnosis                | Other study results                                                                                                                                                                        | Inapparent reaction | Mild reactions | Moderate reactions | Severe reactions | ECF cases in vaccinated | ECF cases in unvaccinated |
|--------------------|-------------|--------------------------|----------------------------|------------------------------|--------------------------------------------------------------------------------------------------------------------------------------------------------------------------------------------|---------------------|----------------|--------------------|------------------|-------------------------|---------------------------|
|                    |             |                          |                            |                              | mortality in ECF endemic areas following vacc with batch FAO1 in TZ and vaccine FAO-1 was accepted as safe in Tanzania. 30mg/kg OTC preferable                                             |                     |                |                    |                  |                         |                           |
| Anon 1998 (AGAIN)  |             |                          |                            | Blood smears and LN biopsies | High proportion of seroconversion by 30 days (93.9% given 1:80 dose, and 84% given 1:100 dose). No reactions with either dose – both considered safe. Preferential use of the 30 mg/kg OTC |                     |                |                    |                  |                         |                           |
| Anon 1999a (AGAIN) |             |                          |                            | Blood smears and LN biopsies | 95% and 100% Seroconversion by 45 days. Safety of both vaccs at 1:80 dilution with OTC 30mg/kg. 30mg/kg OTC preferable in reducing reactions                                               |                     |                |                    |                  |                         |                           |

| Reference           | Study/Trial    | ECF deaths in vaccinated | ECF deaths in unvaccinated | ECF diagnosis                    | Other study results                                                                                                                                                                                                                              | Inapparent reaction | Mild reactions | Moderate reactions | Severe reactions | ECF cases in vaccinated | ECF cases in unvaccinated |
|---------------------|----------------|--------------------------|----------------------------|----------------------------------|--------------------------------------------------------------------------------------------------------------------------------------------------------------------------------------------------------------------------------------------------|---------------------|----------------|--------------------|------------------|-------------------------|---------------------------|
| ILRI 1996           |                |                          |                            | Blood smears and serology        | sero-conversion and protection against homologous challenge from 1:10 to 1:80 vacc. All doses safe i.e. standard 1:80 dilution safe at least at double concentration and probably higher                                                         |                     |                |                    |                  |                         |                           |
| Mbyuzi 2013         | Longitudinal 1 |                          |                            | Blood and LN smears              | 3/768 vacc (0.4%) clinical reaction within 2 weeks of vacc. 431/515 ECF cases in calves born to vacc cows (83.7%) compared to 59 ECF cases in calves born to non-vacc cows (11.5%). Reported need for further safety evaluation and verification |                     |                |                    |                  |                         |                           |
| Mutugi 1997 (AGAIN) |                |                          |                            | Blood and LN smears and serology | Direct evidence of efficacy of 1:80 dose of FAO-1 vs experimental challenge.                                                                                                                                                                     |                     |                |                    |                  |                         |                           |

| Reference                   | Study/Trial       | ECF deaths in vaccinated | ECF deaths in unvaccinated | ECF diagnosis                  | Other study results                                                                                                                                                                                                                                                                  | Inapparent reaction                      | Mild reactions                                         | Moderate reactions | Severe reactions  | ECF cases in vaccinated | ECF cases in unvaccinated |
|-----------------------------|-------------------|--------------------------|----------------------------|--------------------------------|--------------------------------------------------------------------------------------------------------------------------------------------------------------------------------------------------------------------------------------------------------------------------------------|------------------------------------------|--------------------------------------------------------|--------------------|-------------------|-------------------------|---------------------------|
|                             |                   |                          |                            |                                | 1:80 dose safe in terms of survival and few reactions                                                                                                                                                                                                                                |                                          |                                                        |                    |                   |                         |                           |
| Mutugi date unknown (AGAIN) |                   | 5 (0.01%)                |                            |                                | 90% reduction in morbidity/mortality in Tanzania. No safety issues re. pregnant, lactating, breed, age, sex. No reactions in calves                                                                                                                                                  |                                          |                                                        | 2,700 (7%) vacc    | 1,000 (2.7%) vacc |                         |                           |
| Patel 2016 (AGAIN)          | Stage 1 immunized |                          |                            | Blood smears, serology and PCR | Severe reactions observed in all animals given undiluted vaccine and all given dilutions from 1:10 to 1:80, with remaining animals undergoing mild or inapparent reactions. All control animals severe reactions to challenge. Concluded that 1ml of a 1:100 vaccine dose considered | 1/5 (1:80)<br>1/5 (1:120)<br>1/5 (1:160) | 5/5 (1:40)<br>4/5 (1:80)<br>4/5 (1:120)<br>4/5 (1:160) |                    |                   |                         |                           |

| Reference               | Study/Trial        | ECF deaths in vaccinated | ECF deaths in unvaccinated | ECF diagnosis                | Other study results                                                                                                                                    | Inapparent reaction                                     | Mild reactions                                          | Moderate reactions | Severe reactions                         | ECF cases in vaccinated | ECF cases in unvaccinated |
|-------------------------|--------------------|--------------------------|----------------------------|------------------------------|--------------------------------------------------------------------------------------------------------------------------------------------------------|---------------------------------------------------------|---------------------------------------------------------|--------------------|------------------------------------------|-------------------------|---------------------------|
|                         |                    |                          |                            |                              | both safe and efficacious                                                                                                                              |                                                         |                                                         |                    |                                          |                         |                           |
|                         | Stage 1 challenged |                          |                            |                              |                                                                                                                                                        | 5/5 (1:40)<br>3/5 (1:80)<br>4/5 (1:120)<br>4/5 (1:160)  | 2/5 (1:80)<br>1/5 (1:120)                               |                    | 1/5 (1:160)                              |                         |                           |
|                         | Stage 2 immunized  |                          |                            |                              |                                                                                                                                                        | 3/5 (1:80)<br>4/5 (1:100)<br>2/5 (1:120)<br>3/5 (1:140) | 1/5 (1:80)<br>1/5 (1:100)<br>2/5 (1:120)<br>2/5 (1:140) | 1/5 (1:120)        | 1/5 (1:80)                               |                         |                           |
|                         | Stage 2 challenged |                          |                            |                              |                                                                                                                                                        | 1/5 (1:80)<br>3/5 (1:120)<br>1/5 (1:140)                | 1/5 (1:80)<br>3/5 (1:100)<br>2/5 (1:120)<br>2/5 (1:140) |                    | 3/5 (1:80)<br>2/5 (1:100)<br>2/5 (1:140) |                         |                           |
|                         | Stage 3 immunized  |                          |                            |                              |                                                                                                                                                        | 1/5 (1:80)<br>1/5 (1:100)<br>1/5 (1:120)                | 4/5 (1:100)<br>4/5 (1:120)<br>5/5 (1:140)               | 4/5 (1:80)         |                                          |                         |                           |
|                         | Stage 3 challenged |                          |                            |                              |                                                                                                                                                        | 1/5 (1:100)<br>1/5 (1:120)<br>4/5 (1:140)               | 5/5 (1:80)<br>4/5 (1:100)<br>4/5 (1:120)                |                    | 1/5 (1:140)                              |                         |                           |
| Turasha 2005 (AGAIN)    |                    | 46/4000 (1.1%)           |                            |                              | Mortality reduced to 1.1% from 20-40%. Overall reactor rate is 87 calves (2.2%). MC vacc found to be safe and protective. Protects where buffalo exist |                                                         |                                                         |                    |                                          |                         |                           |
| OTC safety and efficacy |                    |                          |                            |                              |                                                                                                                                                        |                                                         |                                                         |                    |                                          |                         |                           |
| Anon 1998 (AGAIN)       |                    |                          |                            | Blood smears and LN biopsies | High proportion of seroconversion by 30 days                                                                                                           |                                                         |                                                         |                    |                                          |                         |                           |

| Reference          | Study/Trial | ECF deaths in vaccinated | ECF deaths in unvaccinated | ECF diagnosis                | Other study results                                                                                                                                                                                      | Inapparent reaction | Mild reactions | Moderate reactions | Severe reactions | ECF cases in vaccinated | ECF cases in unvaccinated |
|--------------------|-------------|--------------------------|----------------------------|------------------------------|----------------------------------------------------------------------------------------------------------------------------------------------------------------------------------------------------------|---------------------|----------------|--------------------|------------------|-------------------------|---------------------------|
|                    |             |                          |                            |                              | (93.9% given 1:80 dose, and 84% given 1:100 dose). No reactions with either dose – both considered safe. Preferential use of the 30 mg/kg OTC                                                            |                     |                |                    |                  |                         |                           |
| Anon 1999a (AGAIN) |             |                          |                            | Blood smears and LN biopsies | 95% and 100% Seroconversion by 45 days. Safety of both vaccs at 1:80 dilution with OTC 30mg/kg. 30mg/kg OTC preferable in reducing reactions                                                             |                     |                |                    |                  |                         |                           |
| Anon 2007 (AGAIN)  |             |                          |                            |                              | very high degree of vaccine efficacy, based on a 90% reduction in ECF morbidity/ mortality in ECF endemic areas following vacc with batch FAO1 in TZ and vaccine FAO-1 was accepted as safe in Tanzania. |                     |                |                    |                  |                         |                           |

| Reference      | Study/Trial | ECF deaths in vaccinated | ECF deaths in unvaccinated | ECF diagnosis                             | Other study results                                                                          | Inapparent reaction | Mild reactions                          | Moderate reactions | Severe reactions | ECF cases in vaccinated | ECF cases in unvaccinated |
|----------------|-------------|--------------------------|----------------------------|-------------------------------------------|----------------------------------------------------------------------------------------------|---------------------|-----------------------------------------|--------------------|------------------|-------------------------|---------------------------|
|                |             |                          |                            |                                           | 30mg/kg OTC preferable                                                                       |                     |                                         |                    |                  |                         |                           |
| Clarke 1999    |             |                          |                            |                                           | Two OTC formulations (Meril and Boehringer) at 20mg/kg SC or IM were bioequivalent           |                     |                                         |                    |                  |                         |                           |
| Di Giulio 2000 |             |                          |                            | Blood smears and LN biopsies and serology | 30mg/kg optimal dose for ECF-ITM, as 40mg/kg reduced reactions but also fewer seroconversion |                     |                                         |                    |                  |                         |                           |
| Lynen 1999     | 1           | 0/28                     | 2/5                        | Blood smears and LN biopsies              | 14/28 got 30% OTC and 14/28 got 20% OTC                                                      |                     | 21.4% with 20% reduced to 7.1% with 30% |                    |                  |                         |                           |
