# Supplementary material for: Safety and Efficacy of the East Coast Fever Muguga Cocktail Vaccine: A Systematic Review
Source: MDPI journal article supplement (doi:10.3390/vaccines9111318), 2021-11-12
Supplement: s1 [file s1]

## Supplementary File S6: RoB severe reactions final.

Risk of bias of studies included in the meta-analysis of efficacy in response to challenge (severe reactions), using the Risk of Bias tool.

| Study                                 | 1. Was the allocation sequence adequately generated and applied? | 2. Were the groups similar at baseline or were they adjusted for confounders in the analysis? | 3. Was the allocation to the different groups adequately concealed during assignment? | 4. Were the animals randomly housed during the experiment? | 5. Were the caregivers and/or investigators blinded from knowledge which intervention each animal received during the experiment? | 6. Were animals selected at random for outcome assessment? | 7. Was the outcome assessor blinded? | 8. Were incomplete outcome data adequately addressed? | 9. Are reports of the study free of selective outcome reporting? | 10. Was the study apparently free of other problems that could result in high risk of bias? | Summary on the overall risk of study bias |
|---------------------------------------|------------------------------------------------------------------|-----------------------------------------------------------------------------------------------|---------------------------------------------------------------------------------------|------------------------------------------------------------|-----------------------------------------------------------------------------------------------------------------------------------|------------------------------------------------------------|--------------------------------------|-------------------------------------------------------|------------------------------------------------------------------|---------------------------------------------------------------------------------------------|-------------------------------------------|
| Atuhaire <i>et al.</i> , 2020 [1]     | Yes                                                              | Yes                                                                                           | No                                                                                    | Unclear                                                    | No                                                                                                                                | Unclear                                                    | No                                   | Yes                                                   | Yes                                                              | Yes                                                                                         | High                                      |
| Bishop <i>et al.</i> , 2015 [2]       | No                                                               | Yes                                                                                           | No                                                                                    | Unclear                                                    | No                                                                                                                                | Unclear                                                    | No                                   | Yes                                                   | Yes                                                              | Yes                                                                                         | High                                      |
| Dolan <i>et al.</i> , 1980 [3]        | No                                                               | Yes                                                                                           | No                                                                                    | Unclear                                                    | No                                                                                                                                | Unclear                                                    | No                                   | Yes                                                   | Yes                                                              | No                                                                                          | High                                      |
| Melewas, Majaliwa and Lynen, 1999 [4] | No                                                               | Unclear                                                                                       | No                                                                                    | Unclear                                                    | No                                                                                                                                | Unclear                                                    | No                                   | Yes                                                   | Yes                                                              | Yes                                                                                         | High                                      |
| Minjauw <i>et al.</i> , 1998 [5]      | Yes                                                              | Yes                                                                                           | No                                                                                    | Yes                                                        | No                                                                                                                                | Unclear                                                    | No                                   | Yes                                                   | Yes                                                              | Yes                                                                                         | High                                      |
| Musisi <i>et al.</i> , 1996 [6]       | No                                                               | Yes                                                                                           | No                                                                                    | Unclear                                                    | No                                                                                                                                | Unclear                                                    | No                                   | Yes                                                   | Yes                                                              | Yes                                                                                         | High                                      |
| Patel <i>et al.</i> , 2019 [7]        | Yes                                                              | Yes                                                                                           | No                                                                                    | Unclear                                                    | No                                                                                                                                | Unclear                                                    | No                                   | Yes                                                   | Yes                                                              | Yes                                                                                         | High                                      |
| Radley <i>et al.</i> , 1975c [8]      | No                                                               | Unclear                                                                                       | No                                                                                    | Unclear                                                    | No                                                                                                                                | Unclear                                                    | No                                   | Yes                                                   | Yes                                                              | Yes                                                                                         | High                                      |
| Radley <i>et al.</i> , 1979 [9]       | No                                                               | Unclear                                                                                       | No                                                                                    | Unclear                                                    | No                                                                                                                                | Unclear                                                    | No                                   | Yes                                                   | Yes                                                              | Yes                                                                                         | High                                      |

Yes = low risk; No = high risk; Unclear = unclear risk.

References (as listed in Supplementary File 6) – please note that some of these are also cited in the manuscript and are numbered differently

- Atuhaire, D.K.; Muleya, W.; Mbao, V.; Bazarusanga, T.; Gafarasi, I.; Salt, J.; Namangala, B.; Musoke, A.J. Sequence diversity of cytotoxic T cell antigens and satellite marker analysis of *Theileria parva* informs the immunization against East Coast fever in Rwanda. *Parasit. Vectors* **2020**, *13*, doi:10.1186/s13071-020-04322-9.
- Bishop, R.; Hemmink, J.; Morrison, W.; Weir, W.; Toye, P.; Sitt, T.; Spooner, P.; Musoke, A.; Skilton, R.; Odongo, D. The African buffalo parasite *Theileria*. sp. (buffalo) can infect and immortalize cattle leukocytes and encodes divergent orthologues of *Theileria parva* antigen genes. *Int. J. Parasitol. Parasites Wildl.* **2015**, *4*, 333–342, doi:10.1016/j.ijppaw.2015.08.006.
- Dolan, T.T.; Radley, D.E.; Brown, C.G.D.; Cunningham, M.P.; Morzaria, S.P.; Young, A.S. East Coast fever: 4. Further Studies on the Protection of Cattle Immunized with a Combination of Theilerial Strains. *Vet. Parasitol.* **1980**, *6*, 325–332.
- Melewas, J.; Majaliwa, M.; Lynen, L. ECF immunisation in Tanzania. In Proceedings of the FAO/ILRI/OAU-IBAR Workshop “Live Vaccines for *Theileria Parva*: Deployment in Eastern, Central and Southern Africa”, held at ILRI, Nairobi, Kenya 10–12 March 1997; Morzaria, S., Williamson, S., Eds.; ILRI, 1999; pp. 13–20.
- Minjauw, B.; Otte, M.J.; James, A.D.; De Castro, J.J.; Sinyangwe, P. Effect of different East Coast fever control strategies on disease incidence in traditionally managed Sanga cattle in Central Province of Zambia. *Prev. Vet. Med.* **1998**, *35*, 101–113, doi:10.1016/S0167-5877(98)00053-1.
- Musisi, F.L.; Quiroga, J.C.; Kanhai, G.K.; Kamweno, S.P.; Mzoma, F.J.; Njuguna, L.M. *Theileria parva* (Kasoba) isolated and tested in cured cattle after infection with other stocks of *Theileria parva*. *Rev. Breed. Vet. Med. Trop. Ctries.* **1996**, *49*, 42–45, doi:10.19182/remvt.9544.
- Patel, E.; Mwaura, S.; Di Giulio, G.; Cook, E.A.J.; Lynen, G.; Toye, P. Infection and treatment method (ITM) vaccine against East Coast fever: reducing the number of doses per straw for use in smallholder dairy herds by thawing, diluting and refreezing already packaged vaccine. *BMC Vet. Res.* **2019**, *15*, doi:10.1186/s12917-019-1787-y.
- Radley, D.E.; Brown, C.G.D.; Cunningham, M.P.; Kimber, C.D.; Musisi, F.L.; Payne, R.C.; Purnell, R.E.; Stagg, S.M.; Young, A.S. East coast fever: 3. Chemoprophylactic immunization of cattle using oxytetracycline and a combination of theilerial strains. *Vet. Parasitol.* **1975**, *1*, 51–60, doi:10.1016/0304-4017(75)90007-2.
- Radley, D.E.; Young, A.S.; Grootenhuys, J.G.; Cunningham, M.P.; Dolan, T.T.; Morzaria, S.P. Further studies on the immunization of cattle against *Theileria lawrencei* by infection and chemoprophylaxis. *Vet. Parasitol.* **1979**, *5*, 117–128, doi:10.1016/0304-4017(79)90003-7.
