# Supplementary material for: Safety and Efficacy of the East Coast Fever Muguga Cocktail Vaccine: A Systematic Review
Source: Vaccines (Basel). 2021 Nov 12;9(11):1318. doi: 10.3390/vaccines9111318 (PMC8623010; doi:10.3390/vaccines9111318)
Supplement: Supplementary file 1 [file vaccines-09-01318-s001.zip]

Archive with 6 entries (6 files):
- Supplementary File S1 SYRCLE protocol.pdf
- Supplementary File S2 PRISMA checklist.pdf
- Supplementary File S3 Data extraction Excel file.xlsx
- Supplementary File S4 Data extraction.pdf
- Supplementary File S5 RoB mortality.pdf
- Supplementary File S6 RoB severe reactions final.pdf
