# Supplementary material for: Safety and Efficacy of the East Coast Fever Muguga Cocktail Vaccine: A Systematic Review
Source: Vaccines (Basel). 2021 Nov 12;9(11):1318. doi: 10.3390/vaccines9111318 (PMC8623010; doi:10.3390/vaccines9111318)
Supplement: Supplementary file 1 [file vaccines-09-01318-s001.zip › Supplementary File S3 Data extraction Excel file.xlsx]

## Sheet: Sheet1
	Supplementary File S3: Data extraction Excel file.
Study	Reference	Title	Year of Study	Country of Study	Cattle breed	Production system	AEZ	Study type	Randomised	Sample size	vaccine batch	vaccine dose	OCT dose	vaccine efficacy	Seroconversion	vaccine safety	Immunity onset	vaccine duration	other comments	ECF Diagnosis method
	Efficacy
	ECF Mortality in Immunisation trials (quantitative meta)
1	Dolan 1980	East Coast fever: 4. Further Studies on the Protection of Cattle Immunized with a Combination of Theilerial Strains		Kenya	Bos taurus			5 challenge trials	Not stated	5 and 4 (x5)			20mg/kg OTC LA	All vacc cattle survived the 5 challenge trials (only mild or inapparaent reactions), but 72% of controls died - need to make a table of all five trials
2	Lynen et al 1999	The Use of a 30% Formulation of Oxytetracycline Long-Acting in East Coast fever Immunisation in Tanzania		Tanzania	Bos taurus x Bos indicus			challenge	Not stated	(14, 14 and 5) and (50, and 54)			20mg/kg OTC 20% and 30mg/kg OTC 30%	0/28 deaths in vaccinated cf 2/5 deaths in unvacc controls		Expt 1: mild reactors reduced from 21.4% of 20% OTC to 7.1% of 30% OTC. Expt 2: Severe reactors reduced from 44% in 20% OTC to 7.4% with 30% OTC			OTC LA 30% Alamycin reduced reactor numbers (7.4% cf 44%), without compomising seroconversion by day 28 (96% and 95.5%)
3	Lynen 2005	Deployment of a Live ECF Vaccine in Pastoral Areas: Lessons Learned from Tanzania	2000-2004	Tanzania		pastoral grazing	sub-humid highland and medium altitude plains	longitudinal immunization	Yes	50 and 50, and 1038				0% ECF mortality cf 40% ECF mortality in vacc vs unvacc, and 2% vs 46% mort in vacc vs unvacc					it was concluded that muguga cocktail safe and effective under field conditions	Clinical signs and confirmed on microscopy
4	Martins 2010 (efficacy and economics?)	Assessing the impact of East Coast Fever immunisation by the infection and treatment method in Tanzanian pastoralist systems		Tanzania	Zebu	grazed daily	sub-humid highland	50 and 50	Yes				20mg/kg	0.97						microscopy/clinical signs
5	Melewas et al. 1999	ECF immunisation in Tanzania	1990-1997	Tanzania	dairy and crosses		TZ mainland and Tanga coastal	immunization trial	Not stated	(TZ mainland - 14,628 vacc)(Tanga coastal - 15 + 14)				3/15 vacc and 7/14 control died from ECF. But not signif different so MC vacc elicits partial protection of 25-75% in Tanga. Severe reactions in 7/15 vacc and 7/14 unvacc and non or moderate reactions in 8/15 vacc and 7/14 non-vacc		576 (3.9%) reactors to vacc and 54 (0.37%) of these died during monitoring period, while 4 animals (0.03%) died of anaph shock immed after vacc - use table in paper	seroconversion by 30days in 57-100%		reactors linked to expereince of delivery vet
6	Minjauw 1998	Effect of different East Coast fever control strategies on disease incidence in traditionally managed Sanga cattle in Central Province of Zambia	1992-1995	Zambia	Sanga	traditional rangeland grazing		Field trial	Yes		FAO batch 009 and batch 010	0.5ml undiluted batch 009 or 1ml diluted batch 010	20mg/lg of 200mg/ml	Overall 92% efficacy but combined trials so don't think can use. 3/46 ECF deaths in vacc (INT group) and 17/49 ECF deaths in non-vacc (NINT group).		20/20 vacc (INT group)had inapparent reaction compared to 9/20 non-vacc (NINT group) inapparent, 3/20 non-vacc mild and 8/20 non-vacc severe reactions				serology, post-mortem
7	Musisi 1989 (efficacy)	An East Coast fever immunization field trial at Kasoba, Malawi	1987	Malawi	Friesian-Malawi Zebu crossbreds			immunization field trial	Not stated	15 and 19			20mg/kg OTC LA	none of the 19 vacc died from ECF; 9 of 15 control died of ECF
8	Musisi et al 1996	Theileria parva (Kasoba): isolation and challenge of cattle recovered from infection with other Theileria parva stocks		Malwai	Friesian-Malawian zebu crosses			challenge trial	Not stated	17 vacc with MC and 12 controls		0.5ml	20mg/kg	3/17 MC vacc reacted severely and 1 fatal (others did not react or was mild-mod) Schizonts detected in 15 of the 17. 11/12 controls severe reaction and 5 died from ECF (other reacted moderately) Schizonts detected in all 12/12.	Mean prepatent period to schizont 7.9 +/- 1.2 in controls; 10 +/- 1.2 in MC vacc.			duration of detecting schizont 15.5 +/- 2.3 in controls; 9.4 +/- 4.1 in MC vacc		microscopy and post-mortem
9	Mutugi 1991	East Coast fever immunization trials in Uganda	1991	Uganda	Friesians, and exotic cross-breeds and Ankole cross-breeds			immunization trial	Not stated	50				48/50 inppararent reaction to homologous challenge. 2/67 immunized died of T. parva and 1/10 controls died of T. parva		37 of 50 (74%) seroconverted after inapparent reaction; 9 (18%) reacted mildly, 3 (6%) moderate to severe reactions
10	Radley 1975c	East coast fever: 3. Chemoprophylactic immunization of cattle using oxytetracycline and a combination of theilerial strains			Bos taurus				Not stated	Trial 1: 29, Trial 2: 17			Trial 1: 5mg/kg of 50mg/ml OTC x 4 days. Trial 2: 10mg/kg OTC LA	Trial 1: Cattle immun with combination had mild or inapparent reactions to challenges, compared to variable reactions in those immun with one or two strains. Trial 2: Those immun with combo had mild or inapparent reactions to the three challenges, compared to the susceptible cattle died
11	Radley et al 1979	Further studies on the immunization of cattle against Theileria lawrencei by infection and chemoprophylaxis			Bos taurus			Challenge trials	Not stated				20mg/kg LA	Expt 1: 3/20 vacc died ECF and 18/20 controls died ECF. All 20 controls severe rx; vacc had 10 severe reaction, 8 mild and 2 non-rx. Expt 2: 3/6 vacc died ECF and 5/6 controls died ECD. All 6 controls severe rx; vacc had 4 severe and 2 mild rx. Expt 3 (groups 3 and 5 only): 3/5 vacc died ECF and 5/5 controls died ECF. All 5 controls severe rx; vacc had 4 severe and 1 mild rx.
12	Radley 1985	East Coast fever immunization – ﬁeld trials in Malawi	1983-1984	Malawi				immunization trials (x4)	Not stated				20mg/kg OTC LA	Trial 1: No vacc or control died from ECF (although then says 7 controls died from ECF??). Trial 2: 0/19 vacc died, 6/10 controls died from ECF. Trial 3: 0/24 vacc died and 7/12 controls died ECF. Trial 4: 3/15 vacc and 6/8 controls died ECF
13	Schreuder 1976	Studies on Theileriidae (Sporozoa) in Tanzania. VI. Second Field Trial on Immunization against Cattle Theileriosis	1974-1975	Tanzania	European crosses and entirely or half east african shorthorn zebu			immunization trial	Not stated	9 and 9				All controls fatal ECF; 1 vacc died of ECF at day 89 (after 2 month exposure of study)					Higly significant degree of protection against moderate field challenge
14	Sitt et al 2015	Exposure of vaccinated and naive cattle to natural challenge from buffalo-derived Theileria parva		Kenya	Boran			field trial	Yes	24		1ml 1:100 dose	30mg/kg	not effective vs buffalo-derived. No significan difference in survival, or disease onset or progression in vaccinated cf unvaccinated	All but one vaccinated calf seroconverted by day 35, compared to all controls which remained negative by ELISA
15	Tenesi 2015 (safety and efficacy)	An assessment of the efficacy of infection and treatment method against east coast fever and the financial and economic benefits in narok county of Kenya	2004	Kenya		mixed farming (crop:livestock)		longitudinal experimental trial	Yes	123 and 119		1:40 dilution	30% OTC LA 30mg/kg	93% seroconversion. 89.4% efficacy. 1.6% (2/123)ECF morbidity in immuniz and 15.1% (18/119) in controls		No reactors. MC considered safe
16	Uilenberg 1976 IV	Studies on Theileriidae (Sporozoa) in Tanzania. IV. A field trial on immunization against East Coast fever (Theileria parva infection of cattle)		Tanzania	Zebu and 2 bos indicus x bos taurus (precontrols)				Not stated	7 and 5 and 2 precontrols			5mg/kg x 4d	precontrols and controls died from classical ECF within 6 weeks. All but one vaccinated also died but from T. mutans or B. bigemina; vacc became infected with T. parva during exposure without showing ECF symptoms
17	Uilenberg 1977	Studies on Theileriidae (Sporozoa) in Tanzania. X. A Large-scale Field Trial on Immunization Against Cattle Theileriosis		Tanzania	Jersey x East African shorthorn zebu			immunization trial	Not stated	50 vacc and 19 controls			20mg/kg OTC LA	All 19 controls contracted ECF and died. No vacc (0/50) died of ECF (10 died from other causes). Protection between 89.4-100%
18	Uilenberg 1978 (overlapping data with Uilenberg 1977)	Immunization Against East Coast fever		Tanzania	Jersey x zebu				Not stated	50 vacc and 19 controls			20mg/kg OTC LA	Trial 1: All seven controls died from ECF, 0/7 immunised died from ECF (other causes). Trial 2: All 9 controls died from ECF, 1/9 immunised died from ECF after 22 days. Trial 3: 17/19 controls died from ECF alone, 0/50 conracted clinical or fatal ECF - degree of protection 89.4-100%
	Percentage efficacy (descriptive)
19	Kiraithe 2015 (efficacy)	Efficacy of the muguga cocktail east coast fever vaccine at a cattle-buffalo interface in Laikipia county, Kenya	2013 2014	Kenya	Zebu and Boran crosses	extensive free range		challenge	Yes	65 and 65 in two ranches		1ml 1:40 dose	30mg/kg of 30% LA	97.8% and 78.4%			seroconversion >35 days
20	Lynen et al 2012 (efficacy)	East Coast fever immunisation field trial in crossbred dairy cattle in Hanang and Handeni districts in northern Tanzania	1997-2000	Tanzania	Ayrshire or Holstein x Zebu or Boran crossbreeds	smallholder dairy, stall-fed cattle and herded grazing	tropical coastal and temperate highland	longitudinal	No	167 farms		1:10 dose	20mg/kg or 30mg/kg	97.6% and 97.9%
21	Magwisha et al 2011 - Same as Magwisha SE9	The potential of East Coast fever (ECF) Vaccine on Improved and Indigenous Cattle in Tanzania	2005	Tanzania	Indigenous and improved		Morogoro, Mara, Coast and Arusha		Yes	1216 samples				70% efficacy (proportion postiive animals to total number animals = efficacy), i.e. 835 of 1216 (70%) had high antibody titres >20PP	seroprev in vacc was 79%, 82%, 72% and 32%				14/17 (82.4%) farmers interviewed said vacc calves tremendous survival and growth rates
4	Martins 2010 AGAIN (efficacy and economics?)	Assessing the impact of East Coast Fever immunisation by the infection and treatment method in Tanzanian pastoralist systems		Tanzania	Zebu	grazed daily	sub-humid highland	50 and 50	Yes				20mg/kg	0.97						microscopy/clinical signs
22	Nsubuga-Mutaka 1999	ECF immunisation in Uganda		Uganda					Not stated	2,005 vacc				86% protection. 0.16% mortality and 91% of vacc have mild-moderate reactions		91% underwent mild-moderate reactions and mortality in 0.16%
23	Nsubuga-Mutaka et al 2000 (safety and efficacy)	Immunization against east coast fever by infection and treatment method in Uganda	1990-1993 and 1994-1998	Uganda	pure exotic and cross-bred			field trial and observational	Not stated	5370				1990-1993: 90% safety, 94% seroconversion and 80% protection. 1994-1998: 90% safety and 86% sero-conversion		90% safety, and 90% safety (less than 8% required extra tx)
15	Tenesi 2015 AGAIN (safety and efficacy)	An assessment of the efficacy of infection and treatment method against east coast fever and the financial and economic benefits in narok county of Kenya	2004	Kenya		mixed farming (crop:livestock)		longitudinal experimental trial	Yes	123 and 119		1:40 dilution	30% OTC LA 30mg/kg	93% seroconversion. 89.4% efficacy. 1.6% (2/123)ECF morbidity in immuniz and 15.1% (18/119) in controls		No reactors. MC considered safe
	Percentage seroconversion (descriptive)
24	Anon 1998 (SE2)	FAO-1 composite stabilate. Evaluation of efficacy at 1:80 and 1:100 dilutions and treatment with 30% oxytetracycline	1998	Tanzania				immunization trial	Yes	63 and 62		1:80 or 1:100	0.3			1:80 and 1:100 considered safe dilutions in conjunction with 30% OTC, no reactions observed	High proportion of seroconversions in cattle by 30 days (93.9% white tagged (1:80 dilution) and 84% black tagged (1:100 dilution))
25	Anon 1999a (SE3)	FAO-1-2 composite stabilate. Evaluation of efficacy at 1:80 direct dilution and treatment with 30% oxytetracycline	1998-1999	Tanzania	Friesian-Ayrshire crosses			field trial	Yes	31 (FAO-2) and 31 (FAO-1)		1:80 dilution	30% OTC LA 30mg/kg		95% and 100% seroconversion by day 45 in both groups	95% and 100% seroconversion, 1 mild reaction in FAO-1 group only. Safety of both at 1:80 dilution with OTC 30mg/kg	seroconversion by day 45 (both)		30mg/kg OTC prefereable, reducing reactions
26	Atuhaire 2020a (safety and efficacy)	Sequence diversity of cytotoxic T cell antigens and satellite marker analysis of Theileria parva informs the immunization against East Coast fever in Rwanda		Rwanda	local breeds and Friesian			cross-sectional sampling and challenge study	Yes	128 serology, 41 and 40 immunisation		1ml 1:100 dose	30% at 30mg/kg	81.7% (of 41 vacc, 25 non-react, 6 severe react, and of 40 unvacc, 32 severe react, 5/41 non-react)		35 of 41 (85.4%) seroconverted, no adverse reactions. field samples possessed both shared alleles with Muguga cocktail
27	Kazungu 2015 (efficacy) SEROPREV RATHER THAN SEROCONVERSION	Incremental effect of natural tick challenge on the infection and treatment method-induced immunity against T. parva in cattle under agro-pastoral systems in Northern Tanzania	2014	Tanzania	Zebu	agropastoral		cross-sectional	Yes	384					99.2% seroprev in vacc, 96% serocon in unvacc
19	Kiraithe 2015 AGAIN (efficacy)	Efficacy of the muguga cocktail east coast fever vaccine at a cattle-buffalo interface in Laikipia county, Kenya	2013 2014	Kenya	Zebu and Boran crosses	extensive free range		challenge	Yes	65 and 65 in two ranches		1ml 1:40 dose	30mg/kg of 30% LA	97.8% and 78.4% - lower efficacy where sharing of grazing b/w cattle and buffalo compared to where no buffalo shared grazing	vaccinated: 83% Ole Naishu and 69% Matura. Unvaccinated 3.1% Ole Naishu and 6.2% Matura.		seroconversion >35 days
28	Mbassa et al 1998	Immunization against East Coast Fever in field cattle with low infectivity Theileria parva stabilate - preliminary assessment				Boran, Friesian, Ayrshire and crosses with Zebu		immunization trial	Not stated	2 and 2, and 64					comparing -70C for 6 weeks and -70C for >6 months - lack of fatalities in the latter indicate low infectivity, all those tested (n=38) who had been immunized with the latter seroconverted by day 30	The 2 given the former developed ECF, one died. less severe vaccine without use of OTC and monitoring i.e. vaccine can be made safer and cheaper
29	Patel 2019 (safety and efficacy)	Infection and treatment method (ITM) vaccine against East Coast fever: reducing the number of doses per straw for use in smallholder dairy herds by thawing, diluting and refreezing already packaged vaccine			Boran			immunization trial	Yes	6 and 6, and 63		1ml of 1:20 (~1:100 equiv) or 1:14 and 1:10			82% seroconversion - considered effective	1 calf died, 1 calf treated, 82% seroconversion - safe and immunogenic at 1:10	seroconversion <28 days in the 2 groups (n=12) but no controls to compare here
15	Tenesi 2015 (safety and efficacy)	An assessment of the efficacy of infection and treatment method against east coast fever and the financial and economic benefits in narok county of Kenya	2004	Kenya		mixed farming (crop:livestock)		longitudinal experimental trial	Yes	123 and 119		1:40 dilution	30% OTC LA 30mg/kg	93% seroconversion. 89.4% efficacy. 1.6% (2/123)ECF morbidity in immuniz and 15.1% (18/119) in controls		No reactors. MC considered safe
30	Turasha 2011	Pilot Delivery of ECF Vaccine in Smallholder Dairy Production Systems in Kenya	2010-2011	Kenya	dairy			immunization trial	No	3017					mean pre-vacc 19.92 prev compared to 69.62 post-vacc prev i.e. good mean seroconversion	17/3017 (0.5%) reactors and 3 (0.1%) died
31	Wesonga 2013 (efficacy)	East Coast fever (ECF) Vaccine Efficacy Follow Up Studies Under OSRO/KEN/103/SWE Project in Selected Diary Areas and Laikipia	2013	Kenya	Sahiwal and zebu crosses	smallholder dairy production		immunization trial	Yes	(66 and 65)(65 and 66)(36)(181 farmers)		1:40 dilution	30% OTC LA 30mg/kg		83% seroconverted, 69% seroconverted and 51%.				General perception was that ECF vaccine very effective in preventing future occurrence
	Efficacy in response to challenge (severe reactions) (quantitative meta)
26	Atuhaire 2020a AGAIN (safety and efficacy)	Sequence diversity of cytotoxic T cell antigens and satellite marker analysis of Theileria parva informs the immunization against East Coast fever in Rwanda		Rwanda	local breeds and Friesian			cross-sectional sampling and challenge study	Yes	128 serology, 41 and 40 immunisation		1ml 1:100 dose	30% at 30mg/kg	81.7% (of 41 vacc, 25 non-react, 6 severe react, and of 40 unvacc, 32 severe react, 5/41 non-react)		35 of 41 (85.4%) seroconverted, no adverse reactions. field samples possessed both shared alleles with Muguga cocktail
32	Bishop et al 2015	The African buffalo parasite Theileria. sp. (buffalo) can infect and immortalize cattle leukocytes and encodes divergent orthologues of Theileria parva antigen genes		Kenya	Bos taurus (Friesian)			Vaccine trial	Not stated	27 FAO1 vacc and 27 controls. Total of 113 - 86 immun and 27 control	FAO1					Reactions in FAO1 vacc: 5NR, 5MR, 1MOR, 14 SR and two found dead. Reactions in controls: 6NR, 7MR, 0MOR, 14SR
1	Dolan 1980 AGAIN	East Coast fever: 4. Further Studies on the Protection of Cattle Immunized with a Combination of Theilerial Strains		Kenya	Bos taurus			5 challenge trials	Not stated	5 and 4 (x5)			20mg/kg OTC LA	All vacc cattle survived the 5 challenge trials (only mild or inapparaent reactions), but 72% of controls died - need to make a table of all five trials
5	Melewas et al. 1999 AGAIN	ECF immunisation in Tanzania	1990-1997	Tanzania	dairy and crosses		TZ mainland and Tanga coastal	immunization trial	Not stated	(TZ mainland - 14,628 vacc)(Tanga coastal - 15 + 14)				3/15 vacc and 7/14 control died from ECF. But not signif different so MC vacc elicits partial protection of 25-75% in Tanga. Severe reactions in 7/15 vacc and 7/14 unvacc and non or moderate reactions in 8/15 vacc and 7/14 non-vacc		576 (3.9%) reactors to vacc and 54 (0.37%) of these died during monitoring period, while 4 animals (0.03%) died of anaph shock immed after vacc - use table in paper	seroconversion by 30days in 57-100%		reactors linked to expereince of delivery vet
6	Minjauw 1998 AGAIN - check if keep in for mortality as combined mortality over 3 years	Effect of different East Coast fever control strategies on disease incidence in traditionally managed Sanga cattle in Central Province of Zambia	1992-1995	Zambia	Sanga	traditional rangeland grazing		Field trial	Yes		FAO batch 009 and batch 010	0.5ml undiluted batch 009 or 1ml diluted batch 010	20mg/lg of 200mg/ml	Overall 92% efficacy but combined trials so don't think can use. 3/46 ECF deaths in vacc (INT group) and 17/49 ECF deaths in non-vacc (NINT group).		20/20 vacc (INT group)had inapparent reaction compared to 9/20 non-vacc (NINT group) inapparent, 3/20 non-vacc mild and 8/20 non-vacc severe reactions				serology, post-mortem
8	Musisi et al 1996 AGAIN	Theileria parva (Kasoba): isolation and challenge of cattle recovered from infection with other Theileria parva stocks		Malwai	Friesian-Malawian zebu crosses			challenge trial	Not stated	17 vacc with MC and 12 controls		0.5ml	20mg/kg	3/17 MC vacc reacted severely and 1 fatal (others did not react or was mild-mod) Schizonts detected in 15 of the 17. 11/12 controls severe reaction and 5 died from ECF (other reacted moderately) Schizonts detected in all 12/12.	Mean prepatent period to schizont 7.9 +/- 1.2 in controls; 10 +/- 1.2 in MC vacc.			duration of detecting schizont 15.5 +/- 2.3 in controls; 9.4 +/- 4.1 in MC vacc		microscopy and post-mortem
29	Patel 2019 AGAIN (safety and efficacy)	Infection and treatment method (ITM) vaccine against East Coast fever: reducing the number of doses per straw for use in smallholder dairy herds by thawing, diluting and refreezing already packaged vaccine			Boran			immunization trial	Yes	6 and 6, and 63		1ml of 1:20 (~1:100 equiv) or 1:14 and 1:10			82% seroconversion - considered effective	1 calf died, 1 calf treated, 82% seroconversion - safe and immunogenic at 1:10	seroconversion <28 days
10	Radley 1975c	East coast fever: 3. Chemoprophylactic immunization of cattle using oxytetracycline and a combination of theilerial strains			Bos taurus				Not stated	Trial 1: 29, Trial 2: 17			Trial 1: 5mg/kg of 50mg/ml OTC x 4 days. Trial 2: 10mg/kg OTC LA	Trial 1: Cattle immun with combination had mild or inapparent reactions to challenges, compared to variable reactions in those immun with one or two strains. Trial 2: Those immun with combo had mild or inapparent reactions to the three challenges, compared to the susceptible cattle died
11	Radley et al 1979 AGAIN	Further studies on the immunization of cattle against Theileria lawrencei by infection and chemoprophylaxis			Bos taurus			Challenge trials	Not stated				20mg/kg LA	Expt 1: 3/20 vacc died ECF and 18/20 controls died ECF. All 20 controls severe rx; vacc had 10 severe reaction, 8 mild and 2 non-rx. Expt 2: 3/6 vacc died ECF and 5/6 controls died ECD. All 6 controls severe rx; vacc had 4 severe and 2 mild rx. Expt 3 (groups 3 and 5 only): 3/5 vacc died ECF and 5/5 controls died ECF. All 5 controls severe rx; vacc had 4 severe and 1 mild rx.
	Immunity onset
24	Anon 1998 AGAIN (SE2)	FAO-1 composite stabilate. Evaluation of efficacy at 1:80 and 1:100 dilutions and treatment with 30% oxytetracycline	1998	Tanzania				immunization trial	Yes	63 and 62		1:80 or 1:100	0.3			1:80 and 1:100 considered safe dilutions in conjunction with 30% OTC, no reactions observed	High proportion of seroconversions in cattle by 30 days (93.9% white tagged (1:80 dilution) and 84% black tagged (1:100 dilution))
25	Anon 1999a AGAIN (SE3)	FAO-1-2 composite stabilate. Evaluation of efficacy at 1:80 direct dilution and treatment with 30% oxytetracycline	1998-1999	Tanzania	Friesian-Ayrshire crosses			field trial	Yes	31 (FAO-2) and 31 (FAO-1)		1:80 dilution	30% OTC LA 30mg/kg		95% and 100% seroconversion by day 45 in both groups	95% and 100% seroconversion, 1 mild reaction in FAO-1 group only. Safety of both at 1:80 dilution with OTC 30mg/kg	seroconversion by day 45 (both)		30mg/kg OTC prefereable, reducing reactions
33	Anon 1999b (SE8)	Infectivity/viability test of FAO-1 stabilate after 2.5 years storage at CTTBD, Lilongwe, Malawi, July 1999	1999	Malawi				?immunized but not challenged	Not stated	5 and 5 and 5		concentrated or 1:80 and 1:80 plus OTC	20mg/kg				seroconversion 28-35 days		FAO-1 stored at -20C is stable for at least 2.5 years
19	Kiraithe 2015 AGAIN (efficacy)	Efficacy of the muguga cocktail east coast fever vaccine at a cattle-buffalo interface in Laikipia county, Kenya	2013 2014	Kenya	Zebu and Boran crosses	extensive free range		challenge	Yes	65 and 65 in two ranches		1ml 1:40 dose	30mg/kg of 30% LA	97.8% and 78.4% - lower efficacy where sharing of grazing b/w cattle and buffalo compared to where no buffalo shared grazing			seroconversion >35 days
34	Oura 2004 (safety)	The persistence of component Theileria parva stocks in cattle immunized with the 'Muguga cocktail' live vaccine against East Coast fever in Uganda	2002-2003	Uganda	ASHZ x Friesian				Not stated				1mg/kg LA OTC			Kiambu5 persisted in vacc cattle for <2 years, whilst Muguga and Serengeti largely eliminated by 3 months. No evidence of transmission to in-contact unvacc cattle over a 1year period	48 days	303 days
14	Sitt et al AGAIN 2015	Exposure of vaccinated and naive cattle to natural challenge from buffalo-derived Theileria parva		Kenya	Boran			field trial	Yes	24		1ml 1:100 dose	30mg/kg	not effective vs buffalo-derived. No significan difference in survival, or disease onset or progression in vaccinated cf unvaccinated	All but one vaccinated calf seroconverted by day 35, compared to all controls which remained negative by ELISA
	Immunity duration
34	Oura 2004 AGAIN (safety)	The persistence of component Theileria parva stocks in cattle immunized with the 'Muguga cocktail' live vaccine against East Coast fever in Uganda	2002-2003	Uganda	ASHZ x Friesian				Not stated				1mg/kg LA OTC			Kiambu5 persisted in vacc cattle for <2 years, whilst Muguga and Serengeti largely eliminated by 3 months. No evidence of transmission to in-contact unvacc cattle over a 1year period	48 days	303 days
	vaccine efficacy vs buffalo
32	Bishop et al 2015	The African buffalo parasite Theileria. sp. (buffalo) can infect and immortalize cattle leukocytes and encodes divergent orthologues of Theileria parva antigen genes		Kenya	Bos taurus (Friesian)			Vaccine trial	Not stated	27 FAO1 vacc and 27 controls. Total of 113 - 86 immun and 27 control	FAO1					Reactions in FAO1 vacc: 5NR, 5MR, 1MOR, 14 SR and two found dead. Reactions in controls: 6NR, 7MR, 0MOR, 14SR
35	Di Giulio 2009	Live immunization against East Coast fever-current status						overview	No					92% reduction in overall calf mortality in NCA since immunization (intense wildlife area), and 95% reduced calf mortality at Tanzania-Kenya border areas. Buffalo-derived breakthrough in immunized does not appear to be a problem in TZ
19	Kiraithe 2015 AGAIN (efficacy)	Efficacy of the muguga cocktail east coast fever vaccine at a cattle-buffalo interface in Laikipia county, Kenya	2013 2014	Kenya	Zebu and Boran crosses	extensive free range		challenge	Yes	65 and 65 in two ranches		1ml 1:40 dose	30mg/kg of 30% LA	97.8% and 78.4% - lower efficacy where sharing of grazing b/w cattle and buffalo compared to where no buffalo shared grazing			seroconversion >35 days
3	Lynen 2005	Deployment of a Live ECF Vaccine in Pastoral Areas: Lessons Learned from Tanzania	2000-2004	Tanzania		pastoral grazing	sub-humid highland and medium altitude plains	longitudinal immunization	Yes	50 and 50, and 1038				0% ECF mortality cf 40% ECF mortality in vacc vs unvacc, and 2% vs 46% mort in vacc vs unvacc					it was concluded that muguga cocktail safe and effective under field conditions	Clinical signs and confirmed on microscopy
4	Martins 2010 AGAIN	Assessing the impact of East Coast Fever immunisation by the infection and treatment method in Tanzanian pastoralist systems		Tanzania	Zebu	grazed daily	sub-humid highland	50 and 50	Yes				20mg/kg	0.97						microscopy/clinical signs
36	Obara 2015	Molecular evolution of a central region containing B cell epitopes in the gene encoding the p67 sporozoite antigen within a field population of Theileria parva	2000	Kenya				field trial	Not stated	Total 113	FAO1. Study also looked at Marikebuni stabilates 3014 and 316					53/113 developed clinical and parsitological features typical with buffalo-derived T. parva. Study does not show breakdown of vaccines and reactions - but shared data with Bishop 2015 and Pelle 2011
37	Pelle 2011	Two Theileria parva CD8 T cell antigen genes are more variable in buffalo than cattle parasites, but differ in pattern of sequence diversity	2000	Kenya				Immunization trial	Not stated		FAO1 (also Marikebuni 316 and 3014)			findings consistent with results of vacc studies, with evidence that immunity by ITM with a mixture of parasites is not always effective against challenge with buffalo-derived parasites
11	Radley et al 1979	Further studies on the immunization of cattle against Theileria lawrencei by infection and chemoprophylaxis			Bos taurus			Challenge trials	Not stated				20mg/kg LA	Expt 1: 3/20 vacc died ECF and 18/20 controls died ECF. All 20 controls severe rx; vacc had 10 severe reaction, 8 mild and 2 non-rx. Expt 2: 3/6 vacc died ECF and 5/6 controls died ECD. All 6 controls severe rx; vacc had 4 severe and 2 mild rx. Expt 3 (groups 3 and 5 only): 3/5 vacc died ECF and 5/5 controls died ECF. All 5 controls severe rx; vacc had 4 severe and 1 mild rx.
14	Sitt et al 2015 AGAIN	Exposure of vaccinated and naive cattle to natural challenge from buffalo-derived Theileria parva		Kenya	Boran			field trial	Yes	24		1ml 1:100 dose	30mg/kg	not effective vs buffalo-derived. No significan difference in survival, or disease onset or progression in vaccinated cf unvaccinated	All but one vaccinated calf seroconverted by day 35, compared to all controls which remained negative by ELISA
38	Turasha 2005 (SE14)	Technical Meeting on the Infection and Treatment Method of East Coast fever Immunization and the Way Forward in Kenya	2003	Kenya		pastoral		immunization trial	Not stated	4000			30% OTC LA	Mortality reduced to 1.1% from 20-40%. MC found to protect, even in Loita division where buffalo exist		MC found to be safe. 2.2% reactors (87)
	vaccine efficacy - statement
39	Akoolo 2008	Evaluation of the recognition of Theileria parva vaccine candidate antigens by cytotoxic T lymphocytes from Zebu cattle		Kenya	zebu			challenge study	Not stated	6		1:80 dose		solidly resistant to challenge with FAO1 and TpM after vacc with FAO1
40	Anon 2007 (SE10)	Applying ITM Immunisation in Tanzania using the FAO-1 Vaccine Batch (1998-2007)	1998-2007	Tanzania	exotic and indigenous				Not stated	278677			30% Alamycin OTC LA favoured over 20% formulations	MC accepted as efficacious. Morbidity/mortality rates reduced by >90% i.e. high efficacy		MC accecpted as safe
41	Homewood 2006	Livestock health and socio-economic impacts of a veterinary intervention in Maasailand: Infection-and-treatment vaccine against East Coast fever	2001-2002	Tanzania		agropastoral	semi-arid and sub humid	survival analysis, part of interviews and surveys (participatory)	Not stated	72 households				97% vaccinated likely to survive to 54 months cf 71% unvaccinated. Reduced calf mortality from 20% to 2%
42	Mutugi 1997 (SE1)	Determining a safe and protective immunizing dose for the FAO-1 Theileria parva composite stabilate for use in field vaccinations against East Coast fever	1997	Malawi	Friesian			dose dilution and challenge	Yes	72		1:2 to 1:1024 trialled - 1:80 optimal	20mg/kg	Direct evidence of efficacy of 1:80 vs experimental challenge		1:80 dose found to be safe in terms of survival and few reactions. Reactions and deaths at higher concentrations
43	Mutugi no date	Review of safety and effiacy of ECF-ITM Muguga cocktail		Uganda and Tanzania					Not all	37000				90% reduction in morbidity/mortality in Tanzania		1,000 (2.7%) immunized had severe reactions, 5 (0.01%) deaths, 2,600 (7%) moderate or severe reactions requiring treatment. No safety issues with regards pregnant, lactating, breed, age, sex. Safer in calves as no reactors. More reactions in Bos taurus breeds. Seroconversion >80%.
44	Patel et al 2016	Production and dose determination of the Infection and Treatment Method (ITM) Muguga cocktail vaccine used to control East Coast fever in cattle		Kenya	Friesians, Friesian crosses or Ayrshires			Dose determination/challenge study	Not stated			infectivity trial: undiluted to 1:320. Second stage trial: 1:80, 1:100, 1:120 and 1:140	30mg/kg OTC LA	1ml of 1:100 considered effective, based on reactions after immun and challenge		Infectivity trial: Severe reactions in all animals given undiluted and all dilutions from 1:10 to 1:80. Remaining underwent mild or inapparent reactions. Second stage trial: 1ml of a 1:100 considered safe (can tabulate further detail of varying doses and reactions)			1:100 dilution vacc with 30% OCT safe and effective
10	Radley 1975c	East coast fever: 3. Chemoprophylactic immunization of cattle using oxytetracycline and a combination of theilerial strains			Bos taurus				Not stated	Trial 1: 29, Trial 2: 17			Trial 1: 5mg/kg of 50mg/ml OTC x 4 days. Trial 2: 10mg/kg OTC LA	Trial 1: Cattle immun with combination had mild or inapparent reactions to challenges, compared to variable reactions in those immun with one or two strains. Trial 2: Those immun with combo had mild or inapparent reactions to the three challenges, compared to the susceptible cattle died
45	Steinaa et al 2018	Immunization with one Theileria parva strain results in similar level of CTL strain-specificity and protection compared to immunization with the three-component Muguga cocktail in MHC-matched animals		Kenya	Five friesian and 3 Ayrshire			challenge study	Not stated	8		2ml neat		No broader CTL response in MC immun compared to Muguga strain alone and no substantive difference in protection to MC b/w those vacc with Muguga only or MC
	temp and vaccine efficacy
46	Atuhaire 2020b (efficacy)	An alternative cold chain for storing and transporting East Coast fever vaccine			Friesian			? Immunized but not challenged	Not stated	14 and 13		1:100 dose		no reduction in efficacy when stored at -80C for <30 days
28	Mbassa et al 1998 AGAIN	Immunization against East Coast Fever in field cattle with low infectivity Theileria parva stabilate - preliminary assessment				Boran, Friesian, Ayrshire and crosses with Zebu		immunization trial	Not stated	2 and 2, and 64					comparing -70C for 6 weeks and -70C for >6 months - lack of fatalities in the latter indicate low infectivity, all those tested (n=38) who had been immunized with the latter seroconverted by day 30	The 2 given the former developed ECF, one died. less severe vaccine without use of OTC and monitoring i.e. vaccine can be made safer and cheaper
	Safety
	Shed and transmission (tabulated and descriptive)
47	Amzati et al. 2019 (safety)	Genetic and antigenic variation of the bovine tick-borne pathogen Theileria parva in the Great Lakes region of Central Africa	2015	DRC and Burundi	indigenous	traditional	lowlands, midlands and highlands	cross-sectional	Yes	480						Muguga vaccine component alleles present in all AEZs, may be assoc with unrestricted movement of cattle in the region
48	Chatanga et al 2020 (safety?)	Genetic Diversity and Sequence Polymorphism of Two Genes Encoding Theileria parva Antigens Recognized by CD8+ T Cells among Vaccinated and Unvaccinated Cattle in Malawi	2018	Malawi	Malawi zebu and Holstein Freisian	extensive grazing and semi-intensive		cross-sectional/observational	Not stated	254						possible expansion of vacc components into unvacc cattle
49	De Deken et al 2007 (safety)	An outbreak of East Coast Fever on the Comoros: A consequence of the import of immunised cattle from Tanzania?	2003 2004	Comoros		tethered	high plateau		No	21 and 6						vaccinated can shed Muguga and Kiambu5
50	Mwega et al 2015 (safety?)	Genetic and antigenic diversity of Theileria parva in cattle in Eastern and Southern zones of Tanzania. A study to support control of East Coast fever	2012	Tanzania				cross-sectional/observational	Not stated	39						some field samples genetically related to Muguga vaccine isolate
51	Geysen et al 1999	Molecular epidemiology of Theileria parva in the field	1996-1997	Zambia					No	12 isolates						Possible tick transmission of MC vaccine components
52	Gwakisa et al. 2020 (safety?)(duration?)	Monitoring vaccinated cattle for induction and longevity of persistent tick‐transmissible infection: Implications for wider deployment of live vaccination against East Coast fever in Tanzania	2015?	Tanzania			semi-arid	longitudinal/observational	Yes	410						detection of vaccine component in co-grazing unvaccinated, possible vaccine transmission		carrier state <14 years post-ITM vacc
53	Kerario et al. 2019 (safety?)	Diversity of two Theileria parva CD8+ antigens in cattle and buffalo-derived parasites in Tanzania	2014 2015	Tanzania				cross-sectional/sampling	Not stated	130						Indication of genotype sharing as Muguga vaccine isolate clustering despite no vaccination
54	Magulu et al. 2019a (safety) (see Magulu thesis - same work but presents 11 year duration)	Detection of carrier state and genetic diversity of Theileria parva in ECF-vaccinated and naturally exposed cattle in Tanzania		Tanzania		pastoral and agropastoral			No	336						Muguga vaccine-specific alleles detected in unvacc cattle - potentially transmitted by ticks from vacc to unvacc
55	Mbyuzi et al 2013 (safety)	Preliminary evidence of vertical transmission of Theileria parva sporozoites from ECF immunized cows to offspring in southern Tanzania	2010-2011	Tanzania	indigenous and crossbred	mixed farming systems		longitudinal	Yes	768 and 768			30% OTC LA 30mg/kg	3 of 768 (0.04%) vacc developed ECF		431/515 (84%) ECF cases in calves born to immuniz cows - possibility of vertical transmission of MC vaccine parasites
56	Nambota et al 1997 (safety - spread?)	Characterization of Some Theileria parva Stocks from Zambia Using Monoclonal Antibodies		Zambia					Not stated	17 stocks but unknown cattle numbers						Possible introduction of Theileria stocks via MC use
34	Oura 2004 AGAIN (safety)	The persistence of component Theileria parva stocks in cattle immunized with the 'Muguga cocktail' live vaccine against East Coast fever in Uganda	2002-2003	Uganda	ASHZ x Friesian				Not stated				1mg/kg LA OTC			Kiambu5 persisted in vacc cattle for <2 years, whilst Muguga and Serengeti largely eliminated by 3 months. No evidence of transmission to in-contact unvacc cattle over a 1year period	48 days	303 days
57	Oura et al 2007 (safety - spread)	Theileria parva live vaccination: parasite transmission, persistence and heterologous challenge in the field	2000-2004	Uganda	African shorthorn x friesian				Not stated	13 and 23						Presence of Kiambu5 stock in unvaccinated cattle, indicating 'foreign' vaccine stocks will be introduced to local cattle and tick populations		persistence of K5 persisted in vacc cattle for <4years
58	Rukambile 2014	Molecular epidemiology of Theileria parva in Eastern Zone of Tanzania		Tanzania	TSHZ and crosses of Friesianm Ayrshire and Jersey	transhumance, semi-intesive or zero-grazing		prevalence and genotyping	Not stated	102 samples						isolation of Muguga stock in areas where no immunization cannot exclude possibility of vaccine derived as extensive nomadism, thus sharing of stocks likely to occur
	safety - statement/qualitative
40	Anon 2007 (SE10) AGAIN	Applying ITM Immunisation in Tanzania using the FAO-1 Vaccine Batch (1998-2007)	1998-2007	Tanzania	exotic and indigenous				Not stated	278677			30% Alamycin OTC LA favoured over 20% formulations	MC accepted as efficacious. Morbidity/mortality rates reduced by >90% i.e. high efficacy		MC accecpted as safe
24	Anon 1998 AGAIN (SE2)	FAO-1 composite stabilate. Evaluation of efficacy at 1:80 and 1:100 dilutions and treatment with 30% oxytetracycline	1998	Tanzania				immunization trial	Yes	63 and 62		1:80 or 1:100	0.3			1:80 and 1:100 considered safe dilutions in conjunction with 30% OTC, no reactions observed
25	Anon 1999a AGAIN (SE3)	FAO-1-2 composite stabilate. Evaluation of efficacy at 1:80 direct dilution and treatment with 30% oxytetracycline	1998-1999	Tanzania	Friesian-Ayrshire crosses			field trial	Yes	31 (FAO-2) and 31 (FAO-1)		1:80 dilution	30% OTC LA 30mg/kg		95% and 100% seroconversion by day 45 in both groups	95% and 100% seroconversion, 1 mild reaction in FAO-1 group only. Safety of both at 1:80 dilution with OTC 30mg/kg	seroconversion by day 45 (both)		30mg/kg OTC prefereable, reducing reactions
59	ILRI 1996 (SE4)	Titration of the FAO-1 stabilate	1996	Kenya?? (ILRI?)				challenge	Not stated	2, 2, 2 and 2		1:10, 1:20, 1:40 or 1:80	20mg/kg OTC LA		sero-conversion and protection against homologous challenge from 1:10 to 1:80 vacc	All doses safe i.e. standard 1:80 dilution safe at least at double concentration and probably higher			dose determination - a dilution of 1:80 was found to be an effective dose
55	Mbyuzi et al 2013 AGAIN (safety)	Preliminary evidence of vertical transmission of Theileria parva sporozoites from ECF immunized cows to offspring in southern Tanzania	2010-2011	Tanzania	indigenous and crossbred	mixed farming systems		longitudinal	Yes	768 and 768			30% OTC LA 30mg/kg	3 of 768 (0.04%) vacc developed ECF		431/515 (84%) ECF cases in calves born to immuniz cows - possibility of vertical transmission of MC vaccine parasites
42	Mutugi 1997 AGAIN (SE1)	Determining a safe and protective immunizing dose for the FAO-1 Theileria parva composite stabilate for use in field vaccinations against East Coast fever	1997	Malawi	Friesian			dose dilution and challenge	Yes	72		1:2 to 1:1024 trialled - 1:80 optimal	20mg/kg	Direct evidence of efficacy of 1:80 vs experimental challenge		1:80 dose found to be safe in terms of survival and few reactions. Reactions and deaths at higher concentrations
43	Mutugi no date	Review of safety and effiacy of ECF-ITM Muguga cocktail		Uganda and Tanzania					Not all	37000				90% reduction in morbidity/mortality in Tanzania		1,000 (2.7%) immunized had severe reactions, 5 (0.01%) deaths, 2,600 (7%) moderate or severe reactions requiring treatment. No safety issues with regards pregnant, lactating, breed, age, sex. Safer in calves as no reactors. More reactions in Bos taurus breeds. Seroconversion >80%.
44	Patel et al 2016 AGAIN	Production and dose determination of the Infection and Treatment Method (ITM) Muguga cocktail vaccine used to control East Coast fever in cattle		Kenya	Friesians, Friesian crosses or Ayrshires			Dose determination/challenge study	Not stated			infectivity trial: undiluted to 1:320. Second stage trial: 1:80, 1:100, 1:120 and 1:140	30mg/kg OTC LA	1ml of 1:100 considered effective, based on reactions after immun and challenge		Infectivity trial: Severe reactions in all animals given undiluted and all dilutions from 1:10 to 1:80. Remaining underwent mild or inapparent reactions. Second stage trial: 1ml of a 1:100 considered safe (can tabulate further detail of varying doses and reactions)			1:100 dilution vacc with 30% OCT safe and effective
15	Tenesi 2015 AGAIN (safety and efficacy)	An assessment of the efficacy of infection and treatment method against east coast fever and the financial and economic benefits in narok county of Kenya	2004	Kenya		mixed farming (crop:livestock)		longitudinal experimental trial	Yes	123 and 119		1:40 dilution	30% OTC LA 30mg/kg	93% seroconversion. 89.4% efficacy. 1.6% (2/123)ECF morbidity in immuniz and 15.1% (18/119) in controls		No reactors. MC considered safe
38	Turasha 2005 (SE14)	Technical Meeting on the Infection and Treatment Method of East Coast fever Immunization and the Way Forward in Kenya	2003	Kenya		pastoral		immunization trial	Not stated	4000			30% OTC LA	Mortality reduced to 1.1% from 20-40%. MC found to protect, even in Loita division where buffalo exist		MC found to be safe. 2.2% reactors (87)
	OTC safety and efficacy
24	Anon 1998 AGAIN (SE2)	FAO-1 composite stabilate. Evaluation of efficacy at 1:80 and 1:100 dilutions and treatment with 30% oxytetracycline	1998	Tanzania				immunization trial	Yes	63 and 62		1:80 or 1:100	0.3			1:80 and 1:100 considered safe dilutions in conjunction with 30% OTC, no reactions observed
25	Anon 1999a AGAIN (SE3)	FAO-1-2 composite stabilate. Evaluation of efficacy at 1:80 direct dilution and treatment with 30% oxytetracycline	1998-1999	Tanzania	Friesian-Ayrshire crosses			field trial	Yes	31 (FAO-2) and 31 (FAO-1)		1:80 dilution	30% OTC LA 30mg/kg		95% and 100% seroconversion by day 45 in both groups	95% and 100% seroconversion, 1 mild reaction in FAO-1 group only. Safety of both at 1:80 dilution with OTC 30mg/kg	seroconversion by day 45 (both)		30mg/kg OTC prefereable, reducing reactions
40	Anon 2007 (SE10) AGAIN	Applying ITM Immunisation in Tanzania using the FAO-1 Vaccine Batch (1998-2007)	1998-2007	Tanzania	exotic and indigenous				Not stated	278677			30% Alamycin OTC LA favoured over 20% formulations	MC accepted as efficacious. Morbidity/mortality rates reduced by >90% i.e. high efficacy		MC accecpted as safe			30mg/kg OTC prefereable, reducing reactions
60	Clarke et al 1999 (SE19)	Pharmacokinetics of two long-acting oxytetracycline products administered subcutaneously and intramuscularly			Polled Hereford				Yes	6			20mg/kg			two OTC products bio-equivalent			comparison of OTC preparations - pharmacokinetics bio-equivalent
61	Di Giulio et al 2000	Use of two different dose rates of oxytetracycline in East Coast fever immunisation in Tanzania		Tanzania	Friesian				Yes	27 and 30			30% at 30mg/kg and 40mg/kg OTC						40mg/kg reduced number of reactions but also resulted in fewer seroconversions to vaccine ie 30mg/kg optimal dose for ECF-ITM
2	Lynen et al 1999 AGAIN	The Use of a 30% Formulation of Oxytetracycline Long-Acting in East Coast fever Immunisation in Tanzania		Tanzania	Bos taurus x Bos indicus			challenge	Not stated	(14, 14 and 5) and (50, and 54)			20mg/kg OTC 20% and 30mg/kg OTC 30%	0/28 deaths in vaccinated cf 2/5 deaths in unvacc controls		Expt 1: mild reactors reduced from 21.4% of 20% OTC to 7.1% of 30% OTC. Expt 2: Severe reactors reduced from 44% in 20% OTC to 7.4% with 30% OTC			OTC LA 30% Alamycin reduced reactor numbers (7.4% cf 44%), without compomising seroconversion by day 28 (96% and 95.5%)

## Sheet: Sheet2
Quantitative studies (n = 20)
	ECF Mortality in Immunisation trials (quantitative meta)			Severe reactions (quantitative meta)
	Dolan 1980	East Coast fever: 4. Further Studies on the Protection of Cattle Immunized with a Combination of Theilerial Strains		Atuhaire 2020a AGAIN (safety and efficacy)	Sequence diversity of cytotoxic T cell antigens and satellite marker analysis of Theileria parva informs the immunization against East Coast fever in Rwanda
	Lynen et al 1999	The Use of a 30% Formulation of Oxytetracycline Long-Acting in East Coast fever Immunisation in Tanzania		Dolan 1980 AGAIN	East Coast fever: 4. Further Studies on the Protection of Cattle Immunized with a Combination of Theilerial Strains
	Lynen 2005	Deployment of a Live ECF Vaccine in Pastoral Areas: Lessons Learned from Tanzania		Melewas et al. 1999 AGAIN	ECF immunisation in Tanzania
	Martins 2010 (efficacy and economics?)	Assessing the impact of East Coast Fever immunisation by the infection and treatment method in Tanzanian pastoralist systems		Minjauw 1998 AGAIN - check if keep in for mortality as combined mortality over 3 years	Effect of different East Coast fever control strategies on disease incidence in traditionally managed Sanga cattle in Central Province of Zambia
	Melewas et al. 1999	ECF immunisation in Tanzania		Musisi et al 1996 AGAIN	Theileria parva (Kasoba): isolation and challenge of cattle recovered from infection with other Theileria parva stocks
	Minjauw 1998 - check if keep in for mortality as combined mortality over 3 years	Effect of different East Coast fever control strategies on disease incidence in traditionally managed Sanga cattle in Central Province of Zambia		Patel 2019 AGAIN (safety and efficacy)	Infection and treatment method (ITM) vaccine against East Coast fever: reducing the number of doses per straw for use in smallholder dairy herds by thawing, diluting and refreezing already packaged vaccine
	Musisi 1989 (efficacy)	An East Coast fever immunization field trial at Kasoba, Malawi		Radley 1975c	East coast fever: 3. Chemoprophylactic immunization of cattle using oxytetracycline and a combination of theilerial strains
	Musisi et al 1996	Theileria parva (Kasoba): isolation and challenge of cattle recovered from infection with other Theileria parva stocks		Radley et al 1979 AGAIN	Further studies on the immunization of cattle against Theileria lawrencei by infection and chemoprophylaxis
	Mutugi 1991	East Coast fever immunization trials in Uganda
	Radley 1975c	East coast fever: 3. Chemoprophylactic immunization of cattle using oxytetracycline and a combination of theilerial strains
	Radley et al 1979	Further studies on the immunization of cattle against Theileria lawrencei by infection and chemoprophylaxis
	Radley 1985	East Coast fever immunization – ﬁeld trials in Malawi
	Schreuder 1976	Studies on Theileriidae (Sporozoa) in Tanzania. VI. Second Field Trial on Immunization against Cattle Theileriosis
	Sitt et al 2015	Exposure of vaccinated and naive cattle to natural challenge from buffalo-derived Theileria parva
	Tenesi 2015 (safety and efficacy)	An assessment of the efficacy of infection and treatment method against east coast fever and the financial and economic benefits in narok county of Kenya
	Uilenberg 1976 IV	Studies on Theileriidae (Sporozoa) in Tanzania. IV. A field trial on immunization against East Coast fever (Theileria parva infection of cattle)
	Uilenberg 1977	Studies on Theileriidae (Sporozoa) in Tanzania. X. A Large-scale Field Trial on Immunization Against Cattle Theileriosis
	Uilenberg 1978 (overlapping data with Uilenberg 1977)	Immunization Against East Coast fever

## Sheet: Sheet3
Qualitative studies (n = 49)
	Percentage efficacy (descriptive)
19	Kiraithe 2015 (efficacy)	Efficacy of the muguga cocktail east coast fever vaccine at a cattle-buffalo interface in Laikipia county, Kenya
20	Lynen et al 2012 (efficacy)	East Coast fever immunisation field trial in crossbred dairy cattle in Hanang and Handeni districts in northern Tanzania
21	Magwisha et al 2011 - Same as Magwisha SE9	The potential of East Coast fever (ECF) Vaccine on Improved and Indigenous Cattle in Tanzania
4	Martins 2010 AGAIN (efficacy and economics?)	Assessing the impact of East Coast Fever immunisation by the infection and treatment method in Tanzanian pastoralist systems
22	Nsubuga-Mutaka 1999	ECF immunisation in Uganda
23	Nsubuga-Mutaka et al 2000 (safety and efficacy)	Immunization against east coast fever by infection and treatment method in Uganda
15	Tenesi 2015 AGAIN (safety and efficacy)	An assessment of the efficacy of infection and treatment method against east coast fever and the financial and economic benefits in narok county of Kenya
	Percentage seroconversion (descriptive)
24	Anon 1998 (SE2)	FAO-1 composite stabilate. Evaluation of efficacy at 1:80 and 1:100 dilutions and treatment with 30% oxytetracycline
25	Anon 1999a (SE3)	FAO-1-2 composite stabilate. Evaluation of efficacy at 1:80 direct dilution and treatment with 30% oxytetracycline
26	Atuhaire 2020a (safety and efficacy)	Sequence diversity of cytotoxic T cell antigens and satellite marker analysis of Theileria parva informs the immunization against East Coast fever in Rwanda
27	Kazungu 2015 (efficacy) SEROPREV RATHER THAN SEROCONVERSION	Incremental effect of natural tick challenge on the infection and treatment method-induced immunity against T. parva in cattle under agro-pastoral systems in Northern Tanzania
19	Kiraithe 2015 AGAIN (efficacy)	Efficacy of the muguga cocktail east coast fever vaccine at a cattle-buffalo interface in Laikipia county, Kenya
28	Mbassa et al 1998	Immunization against East Coast Fever in field cattle with low infectivity Theileria parva stabilate - preliminary assessment
29	Patel 2019 (safety and efficacy)	Infection and treatment method (ITM) vaccine against East Coast fever: reducing the number of doses per straw for use in smallholder dairy herds by thawing, diluting and refreezing already packaged vaccine
15	Tenesi 2015 (safety and efficacy)	An assessment of the efficacy of infection and treatment method against east coast fever and the financial and economic benefits in narok county of Kenya	2004	Kenya		mixed farming (crop:livestock)		longitudinal experimental trial	Yes	123 and 119		1:40 dilution	30% OTC LA 30mg/kg	93% seroconversion. 89.4% efficacy. 1.6% (2/123)ECF morbidity in immuniz and 15.1% (18/119) in controls		No reactors. MC considered safe
30	Turasha 2011	Pilot Delivery of ECF Vaccine in Smallholder Dairy Production Systems in Kenya
31	Wesonga 2013 (efficacy)	East Coast fever (ECF) Vaccine Efficacy Follow Up Studies Under OSRO/KEN/103/SWE Project in Selected Diary Areas and Laikipia
	Immunity onset
24	Anon 1998 AGAIN (SE2)	FAO-1 composite stabilate. Evaluation of efficacy at 1:80 and 1:100 dilutions and treatment with 30% oxytetracycline
25	Anon 1999a AGAIN (SE3)	FAO-1-2 composite stabilate. Evaluation of efficacy at 1:80 direct dilution and treatment with 30% oxytetracycline
33	Anon 1999b (SE8)	Infectivity/viability test of FAO-1 stabilate after 2.5 years storage at CTTBD, Lilongwe, Malawi, July 1999
19	Kiraithe 2015 AGAIN (efficacy)	Efficacy of the muguga cocktail east coast fever vaccine at a cattle-buffalo interface in Laikipia county, Kenya
34	Oura 2004 (safety)	The persistence of component Theileria parva stocks in cattle immunized with the 'Muguga cocktail' live vaccine against East Coast fever in Uganda
14	Sitt et al AGAIN 2015	Exposure of vaccinated and naive cattle to natural challenge from buffalo-derived Theileria parva
	Immunity duration
34	Oura 2004 AGAIN (safety)	The persistence of component Theileria parva stocks in cattle immunized with the 'Muguga cocktail' live vaccine against East Coast fever in Uganda
	vaccine efficacy vs buffalo
32	Bishop et al 2015	The African buffalo parasite Theileria. sp. (buffalo) can infect and immortalize cattle leukocytes and encodes divergent orthologues of Theileria parva antigen genes
35	Di Giulio 2009	Live immunization against East Coast fever-current status
19	Kiraithe 2015 AGAIN (efficacy)	Efficacy of the muguga cocktail east coast fever vaccine at a cattle-buffalo interface in Laikipia county, Kenya
3	Lynen 2005	Deployment of a Live ECF Vaccine in Pastoral Areas: Lessons Learned from Tanzania	2000-2004	Tanzania		pastoral grazing	sub-humid highland and medium altitude plains	longitudinal immunization	Yes	50 and 50, and 1038				0% ECF mortality cf 40% ECF mortality in vacc vs unvacc, and 2% vs 46% mort in vacc vs unvacc					it was concluded that muguga cocktail safe and effective under field conditions	Clinical signs and confirmed on microscopy
4	Martins 2010 AGAIN	Assessing the impact of East Coast Fever immunisation by the infection and treatment method in Tanzanian pastoralist systems
36	Obara 2015	Molecular evolution of a central region containing B cell epitopes in the gene encoding the p67 sporozoite antigen within a field population of Theileria parva
37	Pelle 2011	Two Theileria parva CD8 T cell antigen genes are more variable in buffalo than cattle parasites, but differ in pattern of sequence diversity
11	Radley et al 1979	Further studies on the immunization of cattle against Theileria lawrencei by infection and chemoprophylaxis
14	Sitt et al 2015 AGAIN	Exposure of vaccinated and naive cattle to natural challenge from buffalo-derived Theileria parva
38	Turasha 2005 (SE14)	Technical Meeting on the Infection and Treatment Method of East Coast fever Immunization and the Way Forward in Kenya	2003	Kenya		pastoral		immunization trial	Not stated	4000			30% OTC LA	Mortality reduced to 1.1% from 20-40%. MC found to protect, even in Loita division where buffalo exist		MC found to be safe. 2.2% reactors (87)
	vaccine efficacy - statement
39	Akoolo 2008	Evaluation of the recognition of Theileria parva vaccine candidate antigens by cytotoxic T lymphocytes from Zebu cattle
40	Anon 2007 (SE10)	Applying ITM Immunisation in Tanzania using the FAO-1 Vaccine Batch (1998-2007)
41	Homewood 2006	Livestock health and socio-economic impacts of a veterinary intervention in Maasailand: Infection-and-treatment vaccine against East Coast fever
42	Mutugi 1997 (SE1)	Determining a safe and protective immunizing dose for the FAO-1 Theileria parva composite stabilate for use in field vaccinations against East Coast fever
43	Mutugi no date	Review of safety and effiacy of ECF-ITM Muguga cocktail
44	Patel et al 2016	Production and dose determination of the Infection and Treatment Method (ITM) Muguga cocktail vaccine used to control East Coast fever in cattle
10	Radley 1975c	East coast fever: 3. Chemoprophylactic immunization of cattle using oxytetracycline and a combination of theilerial strains
45	Steinaa et al 2018	Immunization with one Theileria parva strain results in similar level of CTL strain-specificity and protection compared to immunization with the three-component Muguga cocktail in MHC-matched animals
	temp and vaccine efficacy
46	Atuhaire 2020b (efficacy)	An alternative cold chain for storing and transporting East Coast fever vaccine
28	Mbassa et al 1998 AGAIN	Immunization against East Coast Fever in field cattle with low infectivity Theileria parva stabilate - preliminary assessment
	Safety
	Shed and Spread (tabulated and descriptive)
47	Amzati et al. 2019 (safety)	Genetic and antigenic variation of the bovine tick-borne pathogen Theileria parva in the Great Lakes region of Central Africa
48	Chatanga et al 2020 (safety?)	Genetic Diversity and Sequence Polymorphism of Two Genes Encoding Theileria parva Antigens Recognized by CD8+ T Cells among Vaccinated and Unvaccinated Cattle in Malawi
49	De Deken et al 2007 (safety)	An outbreak of East Coast Fever on the Comoros: A consequence of the import of immunised cattle from Tanzania?
50	Elisa Mwega et al 2015 (safety?)	Genetic and antigenic diversity of Theileria parva in cattle in Eastern and Southern zones of Tanzania. A study to support control of East Coast fever
51	Geysen et al 1999	Molecular epidemiology of Theileria parva in the field
52	Gwakisa et al. 2020 (safety?)(duration?)	Monitoring vaccinated cattle for induction and longevity of persistent tick‐transmissible infection: Implications for wider deployment of live vaccination against East Coast fever in Tanzania
53	Kerario et al. 2019 (safety?)	Diversity of two Theileria parva CD8+ antigens in cattle and buffalo-derived parasites in Tanzania
54	Magulu et al. 2019a (safety) (see Magulu thesis - same work but presents 11 year duration)	Detection of carrier state and genetic diversity of Theileria parva in ECF-vaccinated and naturally exposed cattle in Tanzania
55	Mbyuzi et al 2013 (safety)	Preliminary evidence of vertical transmission of Theileria parva sporozoites from ECF immunized cows to offspring in southern Tanzania
56	Nambota et al 1997 (safety - spread?)	Characterization of Some Theileria parva Stocks from Zambia Using Monoclonal Antibodies
34	Oura 2004 AGAIN (safety)	The persistence of component Theileria parva stocks in cattle immunized with the 'Muguga cocktail' live vaccine against East Coast fever in Uganda
57	Oura et al 2007 (safety - spread)	Theileria parva live vaccination: parasite transmission, persistence and heterologous challenge in the field
58	Rukambile 2014	Molecular epidemiology of Theileria parva in Eastern Zone of Tanzania
	safety - statement/qualitative
40	Anon 2007 (SE10) AGAIN	Applying ITM Immunisation in Tanzania using the FAO-1 Vaccine Batch (1998-2007)
24	Anon 1998 AGAIN (SE2)	FAO-1 composite stabilate. Evaluation of efficacy at 1:80 and 1:100 dilutions and treatment with 30% oxytetracycline
25	Anon 1999a AGAIN (SE3)	FAO-1-2 composite stabilate. Evaluation of efficacy at 1:80 direct dilution and treatment with 30% oxytetracycline
59	ILRI 1996 (SE4)	Titration of the FAO-1 stabilate
55	Mbyuzi et al 2013 AGAIN (safety)	Preliminary evidence of vertical transmission of Theileria parva sporozoites from ECF immunized cows to offspring in southern Tanzania
42	Mutugi 1997 AGAIN (SE1)	Determining a safe and protective immunizing dose for the FAO-1 Theileria parva composite stabilate for use in field vaccinations against East Coast fever
43	Mutugi no date	Review of safety and effiacy of ECF-ITM Muguga cocktail
44	Patel et al 2016 AGAIN	Production and dose determination of the Infection and Treatment Method (ITM) Muguga cocktail vaccine used to control East Coast fever in cattle
15	Tenesi 2015 AGAIN (safety and efficacy)	An assessment of the efficacy of infection and treatment method against east coast fever and the financial and economic benefits in narok county of Kenya	2004	Kenya		mixed farming (crop:livestock)		longitudinal experimental trial	Yes	123 and 119		1:40 dilution	30% OTC LA 30mg/kg	93% seroconversion. 89.4% efficacy. 1.6% (2/123)ECF morbidity in immuniz and 15.1% (18/119) in controls		No reactors. MC considered safe
38	Turasha 2005 (SE14)	Technical Meeting on the Infection and Treatment Method of East Coast fever Immunization and the Way Forward in Kenya	2003	Kenya		pastoral		immunization trial	Not stated	4000			30% OTC LA	Mortality reduced to 1.1% from 20-40%. MC found to protect, even in Loita division where buffalo exist		MC found to be safe. 2.2% reactors (87)
	OTC safety and efficacy
24	Anon 1998 AGAIN (SE2)	FAO-1 composite stabilate. Evaluation of efficacy at 1:80 and 1:100 dilutions and treatment with 30% oxytetracycline
25	Anon 1999a AGAIN (SE3)	FAO-1-2 composite stabilate. Evaluation of efficacy at 1:80 direct dilution and treatment with 30% oxytetracycline
40	Anon 2007 (SE10) AGAIN	Applying ITM Immunisation in Tanzania using the FAO-1 Vaccine Batch (1998-2007)
60	Clarke et al 1999 (SE19)	Pharmacokinetics of two long-acting oxytetracycline products administered subcutaneously and intramuscularly
61	Di Giulio et al 2000	Use of two different dose rates of oxytetracycline in East Coast fever immunisation in Tanzania
2	Lynen et al 1999 AGAIN	The Use of a 30% Formulation of Oxytetracycline Long-Acting in East Coast fever Immunisation in Tanzania
